# Supplementary material
Source: PubMed Central journal article supplement (PMC4651101)
Supplement: supp_djv151_Supplementary_Materials.pdf [file supp_djv151_Supplementary_Materials.pdf]

## **SUPPLEMENTARY MATERIALS AND METHODS**

### **Cell culture**

Human LC cell lines (A549, H441, H1792, H1975, H520, H1703, and H2170) were obtained from the American Type Culture Collection (ATCC). LC cells were cultured in RPMI-1640 medium (Invitrogen), supplemented with 10% (volume/volume) heat-inactivated fetal bovine/serum (FBS; Sigma Aldrich, St. Louis, MO), 100 U/ml of penicillin G sodium and 100 µg/ml of streptomycin sulfate (Invitrogen). NHTBE cells were obtained from the Lonza Walkersville, Inc. and cultured in BEGM™ with provided supplements. The 1198 human bronchial epithelial cell line was obtained from Dr. R. Lotan (The University of Texas M. D. Anderson Cancer Center, Houston, TX) and Dr. A. Klein-Szanto (Fox Chase Cancer Center, Philadelphia, PA) and grown in Keratinocyte Serum-Free Medium (Life Technologies, Inc., Gaithersburg, MD) containing epidermal growth factor and bovine pituitary extract. Human lung fibroblasts cell lines (MRC5, BJ1, and WI38) were obtained from the ATCC and were cultured in DMEM, supplemented with 10% (volume/volume) heat-inactivated FBS, 100 U/ml of penicillin G sodium and 100 µg/ml of streptomycin sulfate. All cells have been passaged directly from original low-passage stocks and were used before passage 30. The cells were also tested within the last three months for correct morphology by microscope and tested to detect mycoplasma contamination using a MycoAlert mycoplasma detection kit (Lonza Walkersville, Inc.). All of the cells were cultured at 37°C in humidified atmosphere of 95% air and 5% CO<sub>2</sub>.

### **Antibodies/Chemicals**

NASTRp (N6125) and monoclonal anti-β-actin antibody (A2228) were purchased from Sigma Aldrich. Rabbit polyclonal antibody against E2F1 (NM100-92030) and mouse monoclonal E2F8 Antibody (3E9-2F5) were purchased from Novus Biologicals. Anti-E2F2 (ab-138515) and anti-E2F8 (ab-109596) were obtained from Abcam. Rabbit polyclonal antibody against UHRF1 (A301-470A) was

purchased from Bethyl Laboratories, Inc. Anti-PCNA (2586), anti-cyclin A2 (4656), anti-cyclin B1 (4138), and anti-cyclin E2 (4132) were obtained from Cell Signaling Technology. Rabbit monoclonal cyclin D1 antibody (2261-1) was purchased from Epitomics.

### **Knockdown of Genes**

Silencer E2F siRNAs were purchased from Santa Cruz or Invitrogen; E2F1 siRNA (sc-29297, Santa Cruz Biotechnology), E2F2 siRNA (s4409, Invitrogen), E2F8 siRNA-1 (31292, Invitrogen), and E2F8 siRNA-2 (31481, Invitrogen). BLOCK-it Fluorescent Oligo (Invitrogen) was used as a control. Each siRNA was transfected using Lipofectamine RNAiMAX (Invitrogen). Sequences targeted by E2F8 shRNA or UHRF1 shRNA are listed in the Supplementary Table 4. HEK293T cells were plated in 10 cm dishes and transfected 24 h later with DNA from each lentiviral vector (Sigma Aldrich) and packaging plasmids (VSVG and dR8.91) according to Lipofectamin 2000 (Invitrogen) protocol. Medium was changed 24 h after transfection, the viral supernatant was harvested for the subsequent 48 h and filtered using 0.45  $\mu\text{m}$  filters. NHTBE, human fibroblasts, and LC cell lines were infected with lentiviral supernatant with polybrene (Sigma-Aldrich, 8  $\mu\text{g}/\text{ml}$ ) and the cells were selected 48 h later with 1~2  $\mu\text{g}/\text{ml}$  puromycin (MP Biomedicals).

### **Cell Proliferation**

Proliferation of cells was evaluated by the cell-counting method or the MTT assay. After cells were transfected with siRNAs for 48 h, cells were harvested by trypsinization and counted using Trypan blue staining. For MTT assay, cells transfected with siRNAs for 24 h were transferred to the 96-well plates to allow growing for further 48 h. The cells were incubated with MTT (final concentration 0.5 mg/ml) for 4 h at 37°C incubator. Following MTT incubation, 150  $\mu\text{l}$  of 100% DMSO was added to dissolve the crystals. Viable cells were counted by reading the absorbance at 570 nm using a microplate

reader SpectraMax (Molecular Devices).

### **Overexpression of gene in cells**

The 1198-E2F8 and A549-E2F8 was created using PiggyBac Transposon system (Systembio Science, Inc). The gene of *E2F8* was obtained by OriGene, amplified by PCR, and sub-cloned into PB-CMV-MCS vector (PB513B-1, System Bioscience, Inc.). The construct was transfected with Super PiggyBac Transposase expression vector (PB200PA-1, System Bioscience, Inc.) to 1198 and A549 cells using Lipofectamine 2000 (Invitrogen) and selected using puromycin (1 ~ 2 µg/ml).

### **Colony Formation Assay**

At 48 h after transfection by the indicated siRNAs,  $2 \times 10^3$  cells were transferred in the 6-well plates and allowed to grow for 7-14 days. Medium was removed, fixed with 10% formalin for 15 min and followed by staining with crystal violet to visualize the colonies.

### **Transwell Migration Assay**

At 72 h after transfection by the indicated siRNAs, cells were trypsinized, and  $5 \times 10^4$  cells were seeded on the transwell inserts with 8 µm micropore filters (Corning Costar) in 500 µl medium. Medium containing 10% FBS was added to the lower chamber as a chemoattractant. After 24 h, cells on the upper side of the filter were removed with a cotton swab after fixation and staining of the cells. Two or three random fields were imaged per transwell insert and the number of cells that had migrated to the bottom side of the membrane was counted using the particle counting module of ImageJ. Each assay was repeated in three independent experiments.

### **Quantitative Real-time PCR**

Total RNA was purified from cells using an RNeasy Mini Kit (Qiagen). Reverse transcription of total RNA was performed using the M-MLV reverse transcriptase (Promega). Quantitative PCR was performed using *SYBR* Green PCR Core Reagents (Applied Biosystems) and iCycler thermal cycler (Bio-Rad Laboratories). Primer sequences are listed in the Supplementary Table 4 (available online).

### **Western Blot Analysis**

Standard SDS-PAGE and western blotting procedures were used to analyze the expression of various proteins. Whole cell lysates from each of the LC cell lines tested were prepared using SDS lysis buffer (50 mM Tris-HCl, pH 6.8, 2% SDS, 10% glycerol, and 0.02% bromophenol blue) containing protease inhibitors and phosphatase. All proteins were visualized using a horseradish peroxidase-conjugated secondary antibody and Amersham ECL™ Western Blotting Detection Reagents (GE Healthcare Life Sciences).

### **Chromatin Immunoprecipitation (ChIP)**

The SimpleChIP Enzymatic kit (Cell Signaling) was used as described by the manufacturer. PCR was performed with primers specific for the indicated promoter regions and the reactions were performed in triplicate and 1% of total input sample was used as a control. Primer sequences are listed in the Supplementary Table 4 (available online).

### **ChIP sequencing**

For ChIP-seq, two replicates and two controls (IgG and input) were used. Sequences were carried on a HiSeq 2000 generating 76 bp single-end reads. The first 2 and last 4 nucleotides were trimmed with fastx-toolkit (unpublished, [http://hannonlab.cshl.edu/fastx\\_toolkit/index.html](http://hannonlab.cshl.edu/fastx_toolkit/index.html)) to remove low quality bases. Trimmed reads were mapped to the human reference genome (hg19) using BWA-

MEM (1). Only reads with mapping quality scores equal or higher than 20 were kept. Peak and motif finding was performed using HOMER (2). For peak finding, we used transcription factor mode requiring each putative peak to have at least 2-fold normalized tags than input or IgG control samples. Putative peaks were defined with at least 10 tags. In addition, only peaks that were significant in both replicates compared with both controls were reported. Peaks were annotated to gene products using scripts in HOMER by identifying the nearest transcription start site (TSS). Motifs of length 8, 10, and 12 bp were identified for the significant peaks.

### **Comet assay**

The alkaline comet assay was done according to the manufacturer's instruction (Cell Biolabs, Inc.). Briefly, siRNA-treated cells were pelleted and resuspended in ice-cold PBS ( $1 \times 10^5$ /mL). The cells were combined with Comet agarose at 1:10 ratio (v/v) and immediately transferred onto the OxiSelect™ Comet Slide (75  $\mu$ l/well) at 4°C in the dark for 15 min. After 15 min, the slide was transferred into pre-chilled lysis buffer for 1 h at 4°C in the dark. Next, the slide was transferred into pre-chilled alkaline solution for 30 min at 4°C in the dark. The slide was moved to a horizontal electrophoresis chamber, filled with cold alkaline electrophoresis solution, and voltage was applied for 30 min at 1 volt/cm. Then, the slide was transferred into pre-chilled DI H<sub>2</sub>O for 2 min, aspirated, and then repeated twice more. After the final wash, cold 70% ethanol was added on the slide for 5 min and removed. Once the agarose and slide was completely dry, diluted Vista green DNA dye (100  $\mu$ l/well) was added and incubated at room temperature for 15 min, followed by microscopy using a FITC filter. DNA damage was quantified in at least 12 randomly selected comets per slide as the Tail Extent Moment variable (the percentage of DNA in the tail x the tail length) using Comet Assay IV software (<http://www.perceptive.co.uk/cometassay>).

## **TUNEL assay**

TdT-mediated dUTP Nick End Labeling (TUNEL) assay was performed using ApopTag Fluorescein Direct *In Situ* Apoptosis Detection Kit (EMD Millipore). LC cells were transfected with siRNAs for 72 h, followed by fixation with 1% paraformaldehyde in PBS, pH 7.4. Cells were washed with PBS, applied in an equilibration buffer, and incubated with TdT enzyme in a humidified chamber at 37°C for 1 h. Finally, the cells were incubated in working strength stop/wash buffer for 10 min and mounted with ProLong® Gold Antifade Reagent with DAPI (Invitrogen).

## **Luciferase Reporter Assay**

Initially, *UHRF1*-promoter (GeneCopoeia) was sub-cloned into pGL3-Enhancer (Promega). The cells were transfected with pGL3-*UHRF1*-promoter construct and Renilla vector using Lipofectamine 2000. Luciferase activity or Renilla activity was determined by using a Dual-Glo luciferase assay kit (Promega) and followed the manufacturer's instruction.

## **Immunostaining**

Primary antibodies against E2F8 (H00079733-M01, Novus), UHRF1 (A301-470A, Bethyl Laboratories, Inc), and PCNA (2586, Cell Signaling Technology) were used. For immunofluorescence, detection of primary antibodies was done using fluorescent conjugates of Alexa Fluor® 488 antibody (Invitrogen) along with ProLong® Gold Antifade Reagent with DAPI (Invitrogen). Before staining of fixed paraffin-embedded tissues, we followed the standard protocol including the steps of deparaffinization, antigen retrieval, and permeabilization.

## **Analysis by Metacore™**

The set of genes affected by E2F8 siRNA in LC cell lines were uploaded into the

MetaCore+MetaDrug® version 6.16 (GeneGo, Inc.). MetaCore™ is a web-based computational platform primarily designed for the analysis of experimental data (<https://portal.genego.com>). A list of affected genes by E2F8 knockdown was analyzed for relative enrichment for GO processes in MetaCore™ and the results were ranked by p-value. The output p-values reflect scoring, prioritization, and statistical significance of networks according to relevance of input data.

### **Flow Cytometry**

For cell cycle flow cytometry, the cells were fixed in 70% ethanol and stained with propidium iodide staining (BD Pharmingen) for DNA content. Apoptosis was measured using the FITC Annexin V Apoptosis Detection Kit (BD Pharmingen) following the manufacturer's instruction.

**SUPPLEMENTARY TABLES**

**Supplementary Table 1. Genes listed in the heatmap**

| <b>Symbol * (From the left)</b> | <b>Category</b>                                                                                                     |
|---------------------------------|---------------------------------------------------------------------------------------------------------------------|
| CDC23 /// KIF20A                | <b>Cell cycle</b><br><b>DNA replication</b><br><b>Kinetochore</b><br><b>DNA repair</b><br>(Downregulated by NASTRp) |
| DTL                             |                                                                                                                     |
| ASF1B                           |                                                                                                                     |
| MYBL2                           |                                                                                                                     |
| ANLN                            |                                                                                                                     |
| NCAPD2                          |                                                                                                                     |
| TK1                             |                                                                                                                     |
| UBE2T                           |                                                                                                                     |
| GAS2L3                          |                                                                                                                     |
| CCNA2                           |                                                                                                                     |
| MCM3                            |                                                                                                                     |
| MELK                            |                                                                                                                     |
| RFC3                            |                                                                                                                     |
| DLGAP5                          |                                                                                                                     |
| KIF11                           |                                                                                                                     |
| BUB1B /// PAK6                  |                                                                                                                     |
| NCAPH                           |                                                                                                                     |
| BRI3BP                          |                                                                                                                     |
| ARHGAP11A                       |                                                                                                                     |
| HJURP                           |                                                                                                                     |
| CCND3                           |                                                                                                                     |
| SKA2                            |                                                                                                                     |
| TYMS                            |                                                                                                                     |
| AURKA                           |                                                                                                                     |
| CCNB1                           |                                                                                                                     |
| MKI67                           |                                                                                                                     |
| KIF23                           |                                                                                                                     |
| PRC1                            |                                                                                                                     |
| C15orf42                        |                                                                                                                     |
| ZWINT                           |                                                                                                                     |
| CDK1                            |                                                                                                                     |
| PTTG1                           |                                                                                                                     |
| MCM2                            |                                                                                                                     |
| ATAD2                           |                                                                                                                     |
| MAD2L1                          |                                                                                                                     |
| CDK2                            |                                                                                                                     |
| TMEM14A                         |                                                                                                                     |
| CKAP2L                          |                                                                                                                     |
| MCM6                            |                                                                                                                     |
| NCAPG2                          |                                                                                                                     |
| ASPM                            |                                                                                                                     |
| CENPK                           |                                                                                                                     |
| KIAA1524                        |                                                                                                                     |
| SGOL1                           |                                                                                                                     |



|                      |  |
|----------------------|--|
| CDC45                |  |
| CENPI                |  |
| MCM5                 |  |
| PLK4                 |  |
| WDHD1                |  |
| DEPDC1               |  |
| FBXO5                |  |
| CDCA3                |  |
| CENPE                |  |
| SGOL2                |  |
| CSNK1G1 /// KIAA0101 |  |
| FAM64A               |  |
| MCM10                |  |
| BRIP1                |  |
| NUF2                 |  |
| EXO1                 |  |
| TTK                  |  |
| XRCC2                |  |
| MCM4                 |  |
| RRM2                 |  |
| FAM83D               |  |
| UHRF1                |  |
| ESCO2                |  |
| PCNA /// PCNA-AS     |  |
| GIN51                |  |
| NEIL3                |  |
| SHCBP1               |  |
| CCPG1                |  |
| CTAGE5               |  |
| PABPC1L              |  |
| PTPDC1               |  |
| DNAJB9               |  |
| LPXN                 |  |
| ACAD11 /// NPHP3     |  |
| C5orf41              |  |
| C6orf48              |  |
| DDIT4                |  |
| CEBPG                |  |
| WIP1                 |  |
| ASNS                 |  |
| GTPBP2               |  |
| FAM129A              |  |
| LAMP3                |  |
| SESN2                |  |
| C20orf69 /// PCMTD2  |  |
| JMY                  |  |
| PCK2                 |  |
| NCRNA00219           |  |
| SLC1A4               |  |
| PPP1R15A             |  |

**Cell death  
Cell cycle arrest**  
(Upregulated by NASTRp)

|                                 |                                                                                      |                                                                                 |
|---------------------------------|--------------------------------------------------------------------------------------|---------------------------------------------------------------------------------|
| FBXO25 /// LOC728323            |                                                                                      |                                                                                 |
| TRIB3                           |                                                                                      |                                                                                 |
| ARHGEF2                         |                                                                                      |                                                                                 |
| SLC6A9                          |                                                                                      |                                                                                 |
| CHAC1                           |                                                                                      |                                                                                 |
| DDIT3                           |                                                                                      |                                                                                 |
| HIST1H2AH                       | <b>DNA repair<br/>Nucleus</b><br>(Downregulated by NASTRp)                           |                                                                                 |
| POLQ                            |                                                                                      |                                                                                 |
| FANCM                           |                                                                                      |                                                                                 |
| POP1                            |                                                                                      |                                                                                 |
| ERCC6L                          |                                                                                      |                                                                                 |
| CNIH2                           |                                                                                      |                                                                                 |
| CDC7                            |                                                                                      |                                                                                 |
| CENPW                           |                                                                                      |                                                                                 |
| CTSL2                           |                                                                                      |                                                                                 |
| KIFC1                           |                                                                                      |                                                                                 |
| NRM                             |                                                                                      |                                                                                 |
| CDKN2C                          |                                                                                      | <b>Transcription<br/>corepressor<br/>activity</b><br>(Upregulated by<br>NASTRp) |
| LOC375010                       |                                                                                      |                                                                                 |
| BEST1                           |                                                                                      |                                                                                 |
| INHBE                           |                                                                                      |                                                                                 |
| ATF3                            |                                                                                      |                                                                                 |
| C6orf225 /// TUBE1 ///<br>WISP3 |                                                                                      |                                                                                 |
| RAD54L                          |                                                                                      |                                                                                 |
| TCF19                           | <b>DNA packaging<br/>Cell proliferation<br/>Nucleus</b><br>(Downregulated by NASTRp) |                                                                                 |
| CDC25A                          |                                                                                      |                                                                                 |
| CLSPN                           |                                                                                      |                                                                                 |
| DSCC1                           |                                                                                      |                                                                                 |
| DNA2                            |                                                                                      |                                                                                 |
| OIP5                            |                                                                                      |                                                                                 |
| HIST1H4A                        |                                                                                      |                                                                                 |
| ORC1                            |                                                                                      |                                                                                 |
| SPC25                           |                                                                                      |                                                                                 |
| E2F8                            |                                                                                      |                                                                                 |
| HELLS                           |                                                                                      |                                                                                 |
| GINS4                           |                                                                                      |                                                                                 |
| ZNF367                          |                                                                                      |                                                                                 |
| FAM111B                         |                                                                                      |                                                                                 |
| CCNE2                           |                                                                                      |                                                                                 |
| SPC24                           |                                                                                      |                                                                                 |
| LMNB1                           |                                                                                      |                                                                                 |
| GTSE1                           |                                                                                      |                                                                                 |
| DEPDC1B                         |                                                                                      |                                                                                 |
| KNTC1                           |                                                                                      |                                                                                 |
| C11orf82                        |                                                                                      |                                                                                 |
| POLA2                           |                                                                                      |                                                                                 |
| FEN1                            |                                                                                      |                                                                                 |
| SLC39A10                        |                                                                                      |                                                                                 |

|          |  |
|----------|--|
| GMNN     |  |
| RAD51    |  |
| ATAD5    |  |
| RAD51AP1 |  |
| DUT      |  |
| ESPL1    |  |
| CCNF     |  |
| TACC3    |  |
| HIST1H3A |  |
| PBK      |  |
| BIRC5    |  |
| KIF18B   |  |
| KIF14    |  |
| KIF20B   |  |

**Supplementary Table 2. DAVID-down/upregulated gene sets by NASTRp treatment**

**Downregulated Pathways**

| Category        | Term                                            | P-Value   |
|-----------------|-------------------------------------------------|-----------|
| GOTERM_BP_FAT   | GO:0000279~M phase                              | 5.32E-038 |
| GOTERM_BP_FAT   | GO:0007049~cell cycle                           | 9.97E-035 |
| SP_PIR_KEYWORDS | cell division                                   | 1.23E-033 |
| GOTERM_BP_FAT   | GO:0007067~mitosis                              | 6.04E-032 |
| GOTERM_BP_FAT   | GO:0048285~organelle fission                    | 3.27E-031 |
| GOTERM_CC_FAT   | GO:0044427~chromosomal part                     | 2.50E-021 |
| GOTERM_BP_FAT   | GO:0006260~DNA replication                      | 3.96E-019 |
| GOTERM_BP_FAT   | GO:0006259~DNA metabolic process                | 5.04E-017 |
| GOTERM_CC_FAT   | GO:0000775~chromosome, centromeric region       | 2.10E-016 |
| SP_PIR_KEYWORDS | kinetochore                                     | 1.29E-013 |
| GOTERM_BP_FAT   | GO:0007051~spindle organization                 | 4.80E-012 |
| GOTERM_BP_FAT   | GO:0006974~response to DNA damage stimulus      | 2.13E-009 |
| GOTERM_BP_FAT   | GO:0006323~DNA packaging                        | 6.65E-009 |
| GOTERM_CC_FAT   | GO:0015630~microtubule cytoskeleton             | 2.29E-008 |
| GOTERM_BP_FAT   | GO:0051276~chromosome organization              | 2.50E-008 |
| GOTERM_BP_FAT   | GO:0065004~protein-DNA complex assembly         | 2.72E-008 |
| GOTERM_BP_FAT   | GO:0000075~cell cycle checkpoint                | 2.72E-008 |
| GOTERM_BP_FAT   | GO:0006281~DNA repair                           | 2.08E-007 |
| GOTERM_BP_FAT   | GO:0007126~meiosis                              | 5.56E-007 |
| INTERPRO        | IPR019821:Kinesin, motor region, conserved site | 2.30E-005 |
| GOTERM_MF_FAT   | GO:0003777~microtubule motor activity           | 1.18E-004 |
| GOTERM_CC_FAT   | GO:0005577~fibrinogen complex                   | 1.21E-004 |
| GOTERM_MF_FAT   | GO:0004386~helicase activity                    | 9.45E-004 |

**Upregulated Pathways**

| Category     | Term                                            | P-Value |
|--------------|-------------------------------------------------|---------|
| KEGG_PATHWAY | hsa04060:Cytokine-cytokine receptor interaction | 0.0004  |

|               |                                                      |        |
|---------------|------------------------------------------------------|--------|
| GOTERM_BP_FAT | GO:0034976~response to endoplasmic reticulum stress  | 0.0019 |
| GOTERM_BP_FAT | GO:0042981~regulation of apoptosis                   | 0.0052 |
| GOTERM_BP_FAT | GO:0007050~cell cycle arrest                         | 0.0066 |
| GOTERM_BP_FAT | GO:0034620~cellular response to unfolded protein     | 0.0100 |
| GOTERM_BP_FAT | GO:0008285~negative regulation of cell proliferation | 0.0158 |
| GOTERM_BP_FAT | GO:0006836~neurotransmitter transport                | 0.0223 |
| GOTERM_BP_FAT | GO:0006984~ER-nuclear signaling pathway              | 0.0265 |
| GOTERM_BP_FAT | GO:0009404~toxin metabolic process                   | 0.0357 |
| GOTERM_MF_FAT | GO:0005125~cytokine activity                         | 0.0362 |

**Supplementary Table 3. GSEA-Gene sets negatively enriched by NASTRp**

**A. Curated gene sets**

| <b>GENE SET NAME</b>                          | <b>ES</b> | <b>NES</b> | <b>NOM<br/>p-value</b> | <b>FDR<br/>q-value</b> |
|-----------------------------------------------|-----------|------------|------------------------|------------------------|
| FURUKAWA_DUSP6_TARGETS_PCI35_DN               | -0.87     | -2.19      | 0                      | 0.007                  |
| SHEPARD_BMYB_MORPHOLINO_DN                    | -0.67     | -2.14      | 0                      | 0.014                  |
| ZHENG_GLIOMASTOMA_PLASTICITY_UP               | -0.72     | -2.13      | 0                      | 0.012                  |
| CHIANG_LIVER_CANCER_SUBCLASS_PROLIFERATION_UP | -0.80     | -2.12      | 0                      | 0.010                  |
| VECCHI_GASTRIC_CANCER_EARLY_UP                | -0.72     | -2.09      | 0                      | 0.012                  |
| WHITFIELD_CELL_CYCLE_G2                       | -0.74     | -2.07      | 0                      | 0.011                  |
| BASAKI_YBX1_TARGETS_UP                        | -0.74     | -2.06      | 0                      | 0.010                  |
| VANTVEER_BREAST_CANCER_METASTASIS_DN          | -0.74     | -2.05      | 0                      | 0.010                  |
| LINDGREN_BLADDER_CANCER_CLUSTER_1_DN          | -0.64     | -2.05      | 0                      | 0.010                  |
| SARRIO_EPITHELIAL_MESENCHYMAL_TRANSITION_UP   | -0.85     | -2.04      | 0                      | 0.010                  |
| SENGUPTA_NASOPHARYNGEAL_CARCINOMA_UP          | -0.69     | -2.03      | 0                      | 0.010                  |
| SHEDDEN_LUNG_CANCER_POOR_SURVIVAL_A6          | -0.74     | -2.03      | 0                      | 0.009                  |
| OLSSON_E2F3_TARGETS_DN                        | -0.79     | -2.02      | 0                      | 0.010                  |
| PID_E2F_PATHWAY                               | -0.74     | -2.01      | 0                      | 0.010                  |
| PUJANA_BREAST_CANCER_LIT_INT_NETWORK          | -0.74     | -2.00      | 0                      | 0.010                  |
| AFFAR_YY1_TARGETS_DN                          | -0.67     | -2.00      | 0                      | 0.010                  |
| TANG_SENESCENCE_TP53_TARGETS_DN               | -0.91     | -1.99      | 0                      | 0.010                  |
| KOBAYASHI_EGFR_SIGNALING_24HR_DN              | -0.87     | -1.99      | 0                      | 0.010                  |
| LEE_LIVER_CANCER_SURVIVAL_DN                  | -0.64     | -1.97      | 0                      | 0.010                  |
| CHANG_CYCLING_GENES                           | -0.89     | -1.97      | 0                      | 0.010                  |
| KAUFFMANN_DNA_REPLICATION_GENES               | -0.72     | -1.95      | 0                      | 0.011                  |
| LINDGREN_BLADDER_CANCER_CLUSTER_3_UP          | -0.72     | -1.95      | 0                      | 0.011                  |
| BOYAULT_LIVER_CANCER_SUBCLASS_G23_UP          | -0.77     | -1.95      | 0                      | 0.011                  |
| GEORGES_CELL_CYCLE_MIR192_TARGETS             | -0.74     | -1.95      | 0                      | 0.011                  |
| MARKEY_RB1_ACUTE_LOF_DN                       | -0.80     | -1.95      | 0                      | 0.011                  |
| MATZUK_MEIOTIC_AND_DNA_REPAIR                 | -0.66     | -1.95      | 0                      | 0.011                  |
| MORI_MATURE_B_LYMPHOCYTE_DN                   | -0.70     | -1.95      | 0                      | 0.011                  |
| PAL_PRMT5_TARGETS_UP                          | -0.68     | -1.95      | 0                      | 0.011                  |
| GRAHAM_CML_DIVIDING_VS_NORMAL_QUIESCENT_UP    | -0.86     | -1.94      | 0                      | 0.011                  |
| WHITFIELD_CELL_CYCLE_S                        | -0.70     | -1.94      | 0                      | 0.011                  |

## B. Oncogenic driver signatures

| GENE SET NAME      | ES    | NES   | NOM p-value | FDR q-value |
|--------------------|-------|-------|-------------|-------------|
| RB_P107_DN.V1_UP   | -0.83 | -2.07 | 0           | 0.007       |
| VEGF_A_UP.V1_DN    | -0.60 | -2.01 | 0           | 0.007       |
| E2F1_UP.V1_UP      | -0.63 | -1.94 | 0           | 0.007       |
| RB_P130_DN.V1_UP   | -0.53 | -1.87 | 0           | 0.008       |
| PRC2_EZH2_UP.V1_UP | -0.61 | -1.85 | 0           | 0.008       |
| RB_DN.V1_UP        | -0.55 | -1.77 | 0           | 0.010       |
| SRC_UP.V1_DN       | -0.51 | -1.67 | 0           | 0.016       |
| EGFR_UP.V1_DN      | -0.47 | -1.63 | 0           | 0.022       |
| ERB2_UP.V1_DN      | -0.42 | -1.53 | 0           | 0.053       |
| MTOR_UP.V1_UP      | -0.42 | -1.47 | 0           | 0.091       |

## C. Transcription factor targets

| GENE SET NAME           | ES    | NES   | NOM p-value | FDR q-value |
|-------------------------|-------|-------|-------------|-------------|
| V\$E2F_Q6_01            | -0.67 | -2.03 | 0           | 0.001       |
| V\$E2F_Q3               | -0.68 | -2.03 | 0           | 0.001       |
| V\$E2F_03               | -0.67 | -2.01 | 0           | 0.001       |
| V\$E2F1_Q6_01           | -0.68 | -2.01 | 0           | 0.001       |
| V\$E2F1_Q3              | -0.69 | -2.01 | 0           | 0.001       |
| V\$E2F_Q4_01            | -0.66 | -2.00 | 0           | 0.001       |
| V\$E2F4DP1_01           | -0.71 | -1.99 | 0           | 0.001       |
| V\$E2F1_Q6              | -0.72 | -1.99 | 0           | 0.001       |
| SGCGSSAAA_V\$E2F1DP2_01 | -0.74 | -1.97 | 0           | 0.001       |
| V\$E2F_02               | -0.71 | -1.96 | 0           | 0.001       |
| V\$E2F_Q4               | -0.70 | -1.96 | 0           | 0.001       |
| V\$E2F1DP1_01           | -0.70 | -1.96 | 0           | 0.001       |
| V\$E2F1DP2_01           | -0.70 | -1.96 | 0           | 0.001       |
| V\$E2F4DP2_01           | -0.70 | -1.96 | 0           | 0.001       |
| V\$E2F1DP1RB_01         | -0.69 | -1.96 | 0           | 0.001       |
| V\$E2F_Q6               | -0.72 | -1.95 | 0           | 0.001       |

**Supplementary Table 4. Primer sequences for qPCR or ChIP assay and shRNA sequences**

| <b>Primer Name</b> | <b>Sequence</b>         |
|--------------------|-------------------------|
| E2F1_FW            | CCATCAGTACCTGGCCGAGAGC  |
| E2F1_RV            | CGCTTCTGCACCTTCAGCACCT  |
| E2F2_FW            | GGCCAAGAACAACATCCAGT    |
| E2F2_RV            | TGTCCTCAGTCAGGTGCTTG    |
| E2F3_FW            | GAGCTAGGAGAAAGCGGTCA    |
| E2F3_RV            | GGAGTTTTTGGACTATCTGGAC  |
| E2F7_FW            | ACAGATGCAGAAACATCCACC   |
| E2F7_RV            | AAGAGCGAGGTCTGTAACCA    |
| E2F8_FW            | CCACCACAGCAAATATCGTG    |
| E2F8_RV            | CTTTGGCCTCAGGTAATCCA    |
| UHRF1_FW           | AGGAGCTGGATGGTGTCTATT   |
| UHRF1_RV           | GCCTGCAGAGGCTGTTCTAC    |
| POM121_FW          | TGGATCGGATAGCGTCTTCT    |
| POM121_RV          | AACGGGAGGTGAATTTCCAT    |
| NDUFB11_FW         | GACAAGTCGCATGTTCCAGA    |
| NDUFB11_RV         | AGAACCCGAGGACGAAAACCT   |
| HAX1_FW            | GGGTCCATAGGCCATACATC    |
| HAX1_RV            | TAGTCACCAGCCCAGGATCT    |
| EIF4EBP1_FW        | AGTTCGACACTCCATCAGG     |
| EIF4EBP1_RV        | CGGGGACTACAGCACGAC      |
| HIST2H2AB_FW       | TGACTCTCCGTTTTCTTGGG    |
| HIST2H2AB_RV       | CAACAAGTTACTCGGGGGTG    |
| HIST1H2BM_FW       | TCCCATAGCCTTGGAAGAGA    |
| HIST1H2BM_RV       | GGCCATTAACAAGGCTCAGA    |
| mE2F8_FW           | CTGTTTGCACGAACACTTATCAG |
| mE2F8_RV           | GTACCGCGCTAGGAATTTGTG   |
| mUHRF1_FW          | CCACACCGTGAACCTCTCTGTC  |
| mUHRF1_RV          | GGCGCACATCATAATCGAAGA   |
| mPCNA_FW           | TTTGAGGCACGCCTGATCC     |
| mPCNA_RV           | GGAGACGTGAGACGAGTCCAT   |



|                                            |                                                                |
|--------------------------------------------|----------------------------------------------------------------|
| UHRF1_#0_5' ChIP                           | CACCCTCTTTCTCGCTTCC                                            |
| UHRF1_#0_3' ChIP                           | TGGGGATGGCGATGAAAC                                             |
| UHRF1_#1_5' ChIP                           | AATAAGAGGCGGCTCAAGTG                                           |
| UHRF1_#1_3' ChIP                           | AGTGCCACTGAGAGGGAAAA                                           |
| Control shRNA (shctrl)<br>(TRC ID: SHC002) | CCGGCAACAAGATGAAGAGCACCAACTC<br>GAGTTGGTGCTCTTCATCTTGTTGTTTTT  |
| E2F8 shRNA-1<br>(ID: TRCN0000017428)       | GCCGCAAAGACAAGTCTTTAA                                          |
| E2F8 shRNA-3<br>(ID: TRCN0000017430)       | CGCCGAGCAGATTATGATGAT                                          |
| E2F8 shRNA-5<br>(ID: TRCN0000017432)       | CATAAGTTCTTAGCACGATAT                                          |
| UHRF1 shRNA-1<br>(ID: TRCN0000004352)      | CCGGCCGCACCAAGGAATGTACCATCTCGA<br>GATGGTACATTCCTTGGTGCGGTTTTT  |
| UHRF1 shRNA-2<br>(ID: TRCN0000004353)      | CCGGGCCTTTGATTCGTTTCCTTCTTCTCGAG<br>AAGAAGGAACGAATCAAAGGCTTTTT |

**Supplementary Table 5. Genes from heatmap in Figure 5**

|           | FC in H1975 | FC in H441 | FC in H520 | FC in 3 cell lines |
|-----------|-------------|------------|------------|--------------------|
| E2F8      | -3.23       | -5.66      | -1.80      | -3.62              |
| UHRF1     | -4.03       | -2.71      | -2.31      | -3.01              |
| SFXN2     | -1.41       | -2.79      | -3.14      | -2.60              |
| HAX1      | -3.84       | -3.66      | -1.47      | -2.53              |
| TTYH3     | -3.32       | -2.85      | -1.84      | -2.50              |
| GMNN      | -2.33       | -3.58      | -1.65      | -2.47              |
| EIF4EBP1  | -2.99       | -2.48      | -2.30      | -2.45              |
| TRIM22    | -2.81       | -1.78      | 1.17       | -2.43              |
| GNPNAT1   | -2.16       | -2.66      | -1.87      | -2.34              |
| C5orf25   | -2.00       | -1.16      | -3.01      | -2.33              |
| STEAP4    | -2.10       | -2.36      | 1.06       | -2.31              |
| SLC38A9   | -2.55       | -2.64      | -1.06      | -2.22              |
| SUV39H1   | -3.01       | -1.84      | -1.79      | -2.20              |
| MX2       | -2.13       | -2.23      | -1.62      | -2.17              |
| TMED8     | -3.34       | -1.87      | -1.25      | -2.17              |
| FAM96A    | -3.18       | -2.30      | -1.74      | -2.15              |
| PARP9     | -1.95       | -2.54      | 1.06       | -2.11              |
| RAB38     | -1.77       | -2.19      | -1.41      | -2.10              |
| TRAM2     | -2.68       | -1.73      | -1.77      | -2.08              |
| COX8A     | -3.05       | -1.77      | -1.79      | -2.08              |
| MRPL45    | -2.87       | -2.07      | -1.77      | -2.07              |
| SMARCA4   | -2.22       | -2.33      | -1.67      | -2.04              |
| LOC146336 | -1.88       | -1.58      | -3.46      | -2.04              |
| LEPROTL1  | -2.36       | -2.01      | -1.83      | -2.03              |
| POLD2     | -2.57       | -1.92      | -1.67      | -2.01              |
| OXA1L     | -2.51       | -1.71      | -1.75      | -2.00              |
| HMOX1     | -2.77       | -2.01      | -1.11      | -2.00              |
| TAB2      | -2.31       | -2.33      | -1.44      | -1.99              |
| HCP5      | -2.33       | -2.17      | -1.23      | -1.98              |
| PLAGL2    | -1.80       | -3.10      | -1.47      | -1.98              |
| CXCL10    | -2.39       | -1.99      | -1.14      | -1.97              |
| RIPK2     | -1.92       | -2.64      | -1.58      | -1.96              |
| HIST1H2BK | -2.71       | -1.88      | -1.28      | -1.96              |
| SHISA5    | -2.11       | -2.01      | -1.41      | -1.95              |
| ZNF382    | -1.80       | -2.64      | 1.09       | -1.94              |
| TMEM8A    | -2.36       | -1.96      | -1.59      | -1.94              |
| PLAUR     | -2.39       | -1.79      | -1.12      | -1.94              |

|           |       |       |       |       |
|-----------|-------|-------|-------|-------|
| C11orf24  | -2.28 | -1.91 | -1.38 | -1.92 |
| MOBKL2A   | -2.03 | -1.97 | -1.51 | -1.92 |
| RTCD1     | -2.13 | -2.43 | -1.37 | -1.91 |
| COX10     | -2.19 | -2.10 | -1.40 | -1.91 |
| SLC19A2   | -2.19 | -2.27 | -1.39 | -1.91 |
| MMGT1     | -2.01 | -2.53 | -1.43 | -1.91 |
| SNRPC     | -2.14 | -1.91 | -1.65 | -1.90 |
| BMP4      | -1.87 | -1.59 | -1.95 | -1.90 |
| ZFAND3    | -2.00 | -2.22 | -1.48 | -1.89 |
| USP41     | -2.08 | -1.79 | -1.24 | -1.88 |
| NDUFB11   | -2.01 | -1.54 | -1.97 | -1.86 |
| OAS2      | -1.78 | -2.08 | 1.02  | -1.86 |
| POM121    | -1.72 | -2.04 | -1.81 | -1.84 |
| POU2F1    | -2.03 | -2.35 | -1.34 | -1.84 |
| MX1       | -1.87 | -2.17 | -1.03 | -1.84 |
| POM121C   | -1.72 | -2.01 | -1.79 | -1.83 |
| MBOAT1    | -2.25 | -1.92 | -1.52 | -1.83 |
| TMEM180   | -1.97 | -2.11 | -1.42 | -1.83 |
| BCL9      | -2.06 | -2.08 | -1.25 | -1.82 |
| PIGU      | -2.00 | -2.01 | -1.47 | -1.82 |
| CENPV     | -2.03 | 1.38  | -1.84 | -1.81 |
| HIST1H2BM | -3.53 | -2.99 | -1.41 | -1.81 |
| HERC6     | -1.93 | -1.75 | 1.13  | -1.80 |
| MED6      | -2.00 | -2.00 | -1.23 | -1.79 |
| C13orf23  | -2.08 | -1.95 | -1.56 | -1.79 |
| PLSCR1    | -1.88 | -1.77 | -1.35 | -1.77 |
| ABR       | -1.75 | -1.88 | -1.17 | -1.76 |
| SP110     | -1.83 | -1.85 | -1.03 | -1.76 |
| CHAC1     | -1.85 | -1.48 | -2.04 | -1.76 |
| CCDC21    | -1.89 | -2.07 | -1.47 | -1.75 |
| CDC34     | -2.00 | -2.11 | -1.47 | -1.75 |
| MOCS3     | -2.03 | -2.01 | -1.18 | -1.75 |
| NHEJ1     | -2.41 | -1.84 | -1.35 | -1.74 |
| PTPN9     | -1.84 | -2.19 | -1.42 | -1.71 |
| SLC37A4   | -1.83 | -1.28 | -1.93 | -1.71 |
| SS18      | -1.79 | -1.95 | -1.36 | -1.70 |
| PCTP      | -2.08 | -1.85 | -1.28 | -1.69 |
| MICB      | -1.85 | -1.82 | -1.29 | -1.68 |
| PLDN      | -1.85 | -1.29 | -1.79 | -1.66 |
| WBP2      | -2.22 | -1.83 | -1.06 | -1.66 |

|              |       |       |       |       |
|--------------|-------|-------|-------|-------|
| MRPL36       | -2.75 | -1.75 | -1.19 | -1.65 |
| HSPC072      | -2.36 | -2.66 | 1.72  | -1.65 |
| SMG7         | -2.19 | -2.22 | -1.20 | -1.64 |
| VAR52        | -1.28 | -1.83 | -1.80 | -1.63 |
| TAF9B        | -2.30 | -2.28 | -1.14 | -1.63 |
| RTKN         | -2.10 | -1.82 | -1.31 | -1.62 |
| NIPA2        | -1.81 | -1.98 | -1.35 | -1.62 |
| WBP11        | -1.82 | -1.87 | -1.09 | -1.58 |
| SNAP23       | -1.77 | -1.93 | -1.17 | -1.57 |
| CX3CL1       | -1.85 | 1.16  | -1.77 | -1.48 |
| CCL20        | -1.80 | -1.84 | -1.20 | -1.47 |
| C1orf83      | -1.97 | -1.80 | 1.27  | -1.40 |
| VPS52        | -2.23 | 1.64  | -2.47 | -1.27 |
| CDSN         | -2.36 | 1.39  | -1.84 | -1.18 |
| TMPRSS11E    | -4.20 | 1.93  | -1.89 | -1.03 |
| DDAH1        | 2.36  | 1.26  | 1.85  | 1.41  |
| LRRC37A      | 2.24  | -1.86 | 1.82  | 1.52  |
| HIPK3        | 1.99  | 1.21  | 1.77  | 1.57  |
| LOC100132426 | 1.80  | 1.77  | 1.11  | 1.62  |
| LOC100133034 | 1.80  | 1.77  | 1.11  | 1.62  |
| SORL1        | 2.30  | -1.05 | 1.97  | 1.73  |
| C6orf15      | 2.76  | 1.13  | 1.93  | 1.73  |
| PIK3R3       | 1.88  | 1.30  | 2.03  | 1.82  |
| ANGPTL4      | 1.83  | 2.58  | -1.52 | 1.96  |
| ENPP5        | -1.02 | 2.23  | 1.95  | 2.11  |
| SESN3        | 1.77  | 2.53  | 2.10  | 2.14  |
| LOC728888    | 3.45  | 1.40  | 2.10  | 2.49  |

FC: Fold Change

**Supplementary Table 6. Metacore-GO processes in E2F8-deficient LC cells.**

| <b>Network</b>                                       | <b>GO processes</b>                                                                                                                                                                                                |
|------------------------------------------------------|--------------------------------------------------------------------------------------------------------------------------------------------------------------------------------------------------------------------|
| DPM2 (reg), JPO1, Exportin 5, HIST1H2BN, IDI1        | Ferric iron transport (26.5%; 3.001e-24)<br>ATP hydrolysis coupled proton transport (26.5%; 4.109e-24)                                                                                                             |
| UHRF1, ELF4, 4E-BP1, MASTL, CYP2R1                   | Regulation of transcription from RNA polymerase II promoter (68.8%; 3.22e-24)<br>Positive regulation of gene expression (64.6%; 2.192e-23)                                                                         |
| C2orf24, Plakophilin 3, OXA1L, UHRF1, PLAGL2         | Regulation of transcription from RNA polymerase II promoter (39.1%; 2.33e-08)<br>Positive regulation of transcription, DNA-dependent (32.6%; 2.587e-07)                                                            |
| E2F8, Geminin, RBM9, PTP-MEG2, BMP4                  | Positive regulation of tyrosine phosphorylation of Stat4 protein (14.6%; 2.4e-18)<br>Canonical Wnt receptor signaling pathway (25.0%; 4.736e-17)<br>Positive regulation of NK T cell activation (14.6%; 1.014e-16) |
| BMP4, COX VIII-2, BGAL, SLC19A2, SP1                 | Ionotropic glutamate receptor signaling pathway (24.5%; 1.014e-24)<br>Cell surface receptor signaling pathway (67.3%; 3.161e-13)                                                                                   |
| ISG15, UHRF1, 4E-BP1, U1C, Ubiquitin                 | Chromatin assembly or disassembly (28.6%; 3.844e-18)<br>DNA packaging (24.5%; 4.728e-14)                                                                                                                           |
| BRG1, CARM1, FLJ32252, MBOAT1, CCL2                  | Positive regulation of macromolecule biosynthetic process (83.7%; 4.007e-37)<br>Positive regulation of nitrogen compound metabolic process (79.6%; 5.295e-33)                                                      |
| VDAC 1, Suv39H1, UHRF1, CDC34, Ubiquitin             | Response to lipid (43.8%; 2.064e-13)<br>Response to chemical stimulus (75.0%; 5.596e-13)                                                                                                                           |
| Cyclin D1, ID3, MSH2, ATF-2/c-Jun, 08p22/MSR1(CD204) | Chromatin assembly or disassembly (48.0%; 5.470e-37)<br>Protein-DNA complex assembly (46.0%; 1.087e-35)                                                                                                            |
| CARM1, E2F8, RBM9, CDCA4, E2F1                       | Regulation of cell cycle (38.8%; 1.238e-12)                                                                                                                                                                        |
| TAB2, TTYH3, CDC34, NF-kB, Ubiquitin                 | Positive regulation of immune system process (81.6%; 1.067e-45)<br>Regulation of immune system process (83.7%; 1.118e-38)                                                                                          |
| VAMP3, PTP-MEG2, hnRNP C, c-Myc, KARS                | Cell-substrate adhesion (28.6%; 2.314e-17)<br>Metanephric glomerular epithelial cell development (12.2%; 1.163e-15)                                                                                                |
| BRG1, GPT, BCL9-2, Beta-catenin, GSK3 beta           | Cell surface receptor signaling pathway (82.0%; 1.825e-21)<br>Signal transduction (86.0%; 4.023e-17)                                                                                                               |

**Supplementary Table 7. List of genes in the Venn diagrams of Supplementary Figure 10**

| <b>Overlapped genes in</b>                   | <b>Number</b> | <b>Symbol</b> |
|----------------------------------------------|---------------|---------------|
| <b>Sup. Fig. 10B</b>                         | 1             | ATRX          |
|                                              | 2             | PIK3R3        |
| <b>Overlapped genes in<br/>Sup. Fig. 10C</b> | 1             | CDCA7         |
|                                              | 2             | DCK           |
|                                              | 3             | DUSP7         |
|                                              | 4             | GMNN          |
|                                              | 5             | HIST1H2BK     |
|                                              | 6             | POLE2         |
|                                              | 7             | SPRED2        |
|                                              | 8             | SUV39H1       |
|                                              | 9             | VAMP3         |

**Supplementary Table 8. List of 204 genes identified by E2F8 ChIP-sequencing**

| <b>Entrez ID</b> | <b>Gene Name</b> | <b>Gene Description</b>                                   |
|------------------|------------------|-----------------------------------------------------------|
| 4173             | <b>MCM4</b>      | minichromosome maintenance complex component 4            |
| 25896            | <b>INTS7</b>     | integrator complex subunit 7                              |
| 84961            | <b>FBXL20</b>    | F-box and leucine-rich repeat protein 20                  |
| 5925             | <b>RB1</b>       | retinoblastoma 1                                          |
| 6224             | <b>RPS20</b>     | ribosomal protein S20                                     |
| 7374             | <b>UNG</b>       | uracil-DNA glycosylase                                    |
| 9179             | <b>AP4M1</b>     | adaptor-related protein complex 4, mu 1 subunit           |
| 4172             | <b>MCM3</b>      | minichromosome maintenance complex component 3            |
| 7884             | <b>SLBP</b>      | stem-loop binding protein                                 |
| 9221             | <b>NOLC1</b>     | nucleolar and coiled-body phosphoprotein 1                |
| 4174             | <b>MCM5</b>      | minichromosome maintenance complex component 5            |
| 51659            | <b>GINS2</b>     | GINS complex subunit 2 (Psf2 homolog)                     |
| 8462             | <b>KLF11</b>     | Kruppel-like factor 11                                    |
| 1869             | <b>E2F1</b>      | E2F transcription factor 1                                |
| 10714            | <b>POLD3</b>     | polymerase (DNA-directed), delta 3, accessory subunit     |
| 84915            | <b>FAM222A</b>   | family with sequence similarity 222, member A             |
| 5902             | <b>RANBP1</b>    | RAN binding protein 1                                     |
| 5292             | <b>PIM1</b>      | Pim-1 proto-oncogene, serine/threonine kinase             |
| 285600           | <b>KIAA0825</b>  | KIAA0825                                                  |
| 51602            | <b>NOP58</b>     | NOP58 ribonucleoprotein                                   |
| 2629             | <b>GBA</b>       | glucosidase, beta, acid                                   |
| 57592            | <b>ZNF687</b>    | zinc finger protein 687                                   |
| 116028           | <b>RMI2</b>      | RecQ mediated genome instability 2                        |
| 7083             | <b>TK1</b>       | thymidine kinase 1, soluble                               |
| 29893            | <b>PSMC3IP</b>   | PSMC3 interacting protein                                 |
| 2146             | <b>EZH2</b>      | enhancer of zeste 2 polycomb repressive complex 2 subunit |
| 4609             | <b>MYC</b>       | v-myc avian myelocytomatosis viral oncogene homolog       |
| 3157             | <b>HMGCS1</b>    | 3-hydroxy-3-methylglutaryl-CoA synthase 1 (soluble)       |
| 1871             | <b>E2F3</b>      | E2F transcription factor 3                                |
| 442075           | <b>EMC3-AS1</b>  | EMC3 antisense RNA 1                                      |
| 29028            | <b>ATAD2</b>     | ATPase family, AAA domain containing 2                    |
| 2956             | <b>MSH6</b>      | mutS homolog 6                                            |
| 5933             | <b>RBL1</b>      | retinoblastoma-like 1                                     |
| 55183            | <b>RIF1</b>      | replication timing regulatory factor 1                    |
| 83638            | <b>C11orf68</b>  | chromosome 11 open reading frame 68                       |
| 79027            | <b>ZNF655</b>    | zinc finger protein 655                                   |
| 116225           | <b>ZMYND19</b>   | zinc finger, MYND-type containing 19                      |
| 55298            | <b>RNF121</b>    | ring finger protein 121                                   |

|               |                 |                                                                         |
|---------------|-----------------|-------------------------------------------------------------------------|
| 83879         | <b>CDCA7</b>    | cell division cycle associated 7                                        |
| 1111          | <b>CHEK1</b>    | checkpoint kinase 1                                                     |
| 81844         | <b>TRIM56</b>   | tripartite motif containing 56                                          |
| 7341          | <b>SUMO1</b>    | small ubiquitin-like modifier 1                                         |
| 3268          | <b>AGFG2</b>    | ArfGAP with FG repeats 2                                                |
| 5883          | <b>RAD9A</b>    | RAD9 homolog A ( <i>S. pombe</i> )                                      |
| 11073         | <b>TOPBP1</b>   | topoisomerase (DNA) II binding protein 1                                |
| 114781        | <b>BTBD9</b>    | BTB (POZ) domain containing 9                                           |
| 57657         | <b>HCN3</b>     | hyperpolarization activated cyclic nucleotide-gated potassium channel 3 |
| 1870          | <b>E2F2</b>     | E2F transcription factor 2                                              |
| 10087428<br>2 | <b>MLIP-IT1</b> | MLIP intronic transcript 1 (non-protein coding)                         |
| 4175          | <b>MCM6</b>     | minichromosome maintenance complex component 6                          |
| 5984          | <b>RFC4</b>     | replication factor C (activator 1) 4, 37kDa                             |
| 7516          | <b>XRCC2</b>    | X-ray repair complementing defective repair in Chinese hamster cells 2  |
| 5965          | <b>RECQL</b>    | RecQ helicase-like                                                      |
| 220032        | <b>GDPD4</b>    | glycerophosphodiester phosphodiesterase domain containing 4             |
| 8270          | <b>LAGE3</b>    | L antigen family, member 3                                              |
| 51147         | <b>ING4</b>     | inhibitor of growth family, member 4                                    |
| 10421         | <b>CD2BP2</b>   | CD2 (cytoplasmic tail) binding protein 2                                |
| 10106054<br>4 | <b>HP08942</b>  | uncharacterized LOC101060544                                            |
| 4176          | <b>MCM7</b>     | minichromosome maintenance complex component 7                          |
| 3795          | <b>KHK</b>      | ketoheokinase (fructokinase)                                            |
| 7481          | <b>WNT11</b>    | wingless-type MMTV integration site family, member 11                   |
| 79019         | <b>CENPM</b>    | centromere protein M                                                    |
| 6434          | <b>TRA2B</b>    | transformer 2 beta homolog ( <i>Drosophila</i> )                        |
| 4171          | <b>MCM2</b>     | minichromosome maintenance complex component 2                          |
| 51631         | <b>LUC7L2</b>   | LUC7-like 2 ( <i>S. cerevisiae</i> )                                    |
| 990           | <b>CDC6</b>     | cell division cycle 6                                                   |
| 2177          | <b>FANCD2</b>   | Fanconi anemia, complementation group D2                                |
| 55798         | <b>METTL2B</b>  | methyltransferase like 2B                                               |
| 5558          | <b>PRIM2</b>    | primase, DNA, polypeptide 2 (58kDa)                                     |
| 10428         | <b>CFDP1</b>    | craniofacial development protein 1                                      |
| 2990          | <b>GUSB</b>     | glucuronidase, beta                                                     |
| 9873          | <b>FCHSD2</b>   | FCH and double SH3 domains 2                                            |
| 7465          | <b>WEE1</b>     | WEE1 G2 checkpoint kinase                                               |
| 29128         | <b>UHRF1</b>    | ubiquitin-like with PHD and ring finger domains 1                       |
| 23344         | <b>ESYT1</b>    | extended synaptotagmin-like protein 1                                   |
| 643836        | <b>ZFP62</b>    | ZFP62 zinc finger protein                                               |
| 64946         | <b>CENPH</b>    | centromere protein H                                                    |



|        |                  |                                                                         |
|--------|------------------|-------------------------------------------------------------------------|
| 3070   | <b>HELLS</b>     | helicase, lymphoid-specific                                             |
| 6426   | <b>SRSF1</b>     | serine/arginine-rich splicing factor 1                                  |
| 2810   | <b>SFN</b>       | stratifin                                                               |
| 1854   | <b>DUT</b>       | deoxyuridine triphosphatase                                             |
| 9531   | <b>BAG3</b>      | BCL2-associated athanogene 3                                            |
| 6631   | <b>SNRPC</b>     | small nuclear ribonucleoprotein polypeptide C                           |
| 81620  | <b>CDT1</b>      | chromatin licensing and DNA replication factor 1                        |
| 79971  | <b>WLS</b>       | wntless Wnt ligand secretion mediator                                   |
| 993    | <b>CDC25A</b>    | cell division cycle 25A                                                 |
| 85236  | <b>HIST1H2BK</b> | histone cluster 1, H2bk                                                 |
| 146956 | <b>EME1</b>      | essential meiotic structure-specific endonuclease 1                     |
| 29119  | <b>CTNNA3</b>    | catenin (cadherin-associated protein), alpha 3                          |
| 4678   | <b>NASP</b>      | nuclear autoantigenic sperm protein (histone-binding)                   |
| 30849  | <b>PIK3R4</b>    | phosphoinositide-3-kinase, regulatory subunit 4                         |
| 677765 | <b>SCARNA18</b>  | small Cajal body-specific RNA 18                                        |
| 195828 | <b>ZNF367</b>    | zinc finger protein 367                                                 |
| 57695  | <b>USP37</b>     | ubiquitin specific peptidase 37                                         |
| 9735   | <b>KNTC1</b>     | kinetochore associated 1                                                |
| 55120  | <b>FANCL</b>     | Fanconi anemia, complementation group L                                 |
| 4522   | <b>MTHFD1</b>    | methylenetetrahydrofolate dehydrogenase (NADP+ dependent) 1             |
| 9156   | <b>EXO1</b>      | exonuclease 1                                                           |
| 26046  | <b>LTN1</b>      | listerin E3 ubiquitin protein ligase 1                                  |
| 55159  | <b>RFWD3</b>     | ring finger and WD repeat domain 3                                      |
| 83990  | <b>BRIP1</b>     | BRCA1 interacting protein C-terminal helicase 1                         |
| 51631  | <b>LUC7L2</b>    | LUC7-like 2 ( <i>S. cerevisiae</i> )                                    |
| 672    | <b>BRCA1</b>     | breast cancer 1, early onset                                            |
| 8660   | <b>IRS2</b>      | insulin receptor substrate 2                                            |
| 23352  | <b>UBR4</b>      | ubiquitin protein ligase E3 component n-recogin 4                       |
| 388182 | <b>SPATA41</b>   | spermatogenesis associated 41 (non-protein coding)                      |
| 23677  | <b>SH3BP4</b>    | SH3-domain binding protein 4                                            |
| 23548  | <b>TTC33</b>     | tetratricopeptide repeat domain 33                                      |
| 54892  | <b>NCAPG2</b>    | non-SMC condensin II complex, subunit G2                                |
| 4439   | <b>MSH5</b>      | mutS homolog 5                                                          |
| 55924  | <b>FAM212B</b>   | family with sequence similarity 212, member B                           |
| 8697   | <b>CDC23</b>     | cell division cycle 23                                                  |
| 374393 | <b>FAM111B</b>   | family with sequence similarity 111, member B                           |
| 4436   | <b>MSH2</b>      | mutS homolog 2                                                          |
| 25923  | <b>ATL3</b>      | atlastin GTPase 3                                                       |
| 4605   | <b>MYBL2</b>     | v-myb avian myeloblastosis viral oncogene homolog-like 2                |
| 57405  | <b>SPC25</b>     | SPC25, NDC80 kinetochore complex component                              |
| 6921   | <b>TCEB1</b>     | transcription elongation factor B (SIII), polypeptide 1 (15kDa, elongin |

|               |                   | C)                                                                   |
|---------------|-------------------|----------------------------------------------------------------------|
| 8914          | <b>TIMELESS</b>   | timeless circadian clock                                             |
| 79717         | <b>PPCS</b>       | phosphopantothencycysteine synthetase                                |
| 283385        | <b>MORN3</b>      | MORN repeat containing 3                                             |
| 9675          | <b>TTI1</b>       | TELO2 interacting protein 1                                          |
| 8533          | <b>COPS3</b>      | COP9 signalosome subunit 3                                           |
| 148645        | <b>LINC00337</b>  | long intergenic non-protein coding RNA 337                           |
| 3925          | <b>STMN1</b>      | stathmin 1                                                           |
| 10052924<br>1 | <b>HSPE1-MOB4</b> | HSPE1-MOB4 readthrough                                               |
| 9631          | <b>NUP155</b>     | nucleoporin 155kDa                                                   |
| 9994          | <b>CASP8AP2</b>   | caspase 8 associated protein 2                                       |
| 84905         | <b>ZNF341</b>     | zinc finger protein 341                                              |
| 28231         | <b>SLCO4A1</b>    | solute carrier organic anion transporter family, member 4A1          |
| 9592          | <b>IER2</b>       | immediate early response 2                                           |
| 9782          | <b>MATR3</b>      | matrin 3                                                             |
| 2630          | <b>GBAP1</b>      | glucosidase, beta, acid pseudogene 1                                 |
| 10246481<br>7 | <b>MIR5787</b>    | microRNA 5787                                                        |
| 8364          | <b>HIST1H4C</b>   | histone cluster 1, H4c                                               |
| 7918          | <b>GPANK1</b>     | G patch domain and ankyrin repeats 1                                 |
| 266743        | <b>NPAS4</b>      | neuronal PAS domain protein 4                                        |
| 5982          | <b>RFC2</b>       | replication factor C (activator 1) 2, 40kDa                          |
| 55833         | <b>UBAP2</b>      | ubiquitin associated protein 2                                       |
| 487           | <b>ATP2A1</b>     | ATPase, Ca <sup>++</sup> transporting, cardiac muscle, fast twitch 1 |
| 54962         | <b>TIPIN</b>      | TIMELESS interacting protein                                         |
| 5928          | <b>RBBP4</b>      | retinoblastoma binding protein 4                                     |
| 6015          | <b>RING1</b>      | ring finger protein 1                                                |
| 5983          | <b>RFC3</b>       | replication factor C (activator 1) 3, 38kDa                          |
| 274           | <b>BIN1</b>       | bridging integrator 1                                                |
| 5359          | <b>PLSCR1</b>     | phospholipid scramblase 1                                            |
| 3834          | <b>KIF25</b>      | kinesin family member 25                                             |
| 54487         | <b>DGCR8</b>      | DGCR8 microprocessor complex subunit                                 |
| 150776        | <b>LOC150776</b>  | sphingomyelin phosphodiesterase 4                                    |
| 5888          | <b>RAD51</b>      | RAD51 recombinase                                                    |
| 6510          | <b>SLC1A5</b>     | solute carrier family 1 (neutral amino acid transporter), member 5   |
| 81624         | <b>DIAPH3</b>     | diaphanous-related formin 3                                          |
| 401233        | <b>HTATSF1P2</b>  | HIV-1 Tat specific factor 1 pseudogene 2                             |
| 5631          | <b>PRPS1</b>      | phosphoribosyl pyrophosphate synthetase 1                            |
| 11144         | <b>DMC1</b>       | DNA meiotic recombinase 1                                            |
| 348235        | <b>SKA2</b>       | spindle and kinetochore associated complex subunit 2                 |

|               |                          |                                                                             |
|---------------|--------------------------|-----------------------------------------------------------------------------|
| 463           | <b>ZFHX3</b>             | zinc finger homeobox 3                                                      |
| 9031          | <b>BAZ1B</b>             | bromodomain adjacent to zinc finger domain, 1B                              |
| 9902          | <b>MRC2</b>              | mannose receptor, C type 2                                                  |
| 10192692<br>6 | <b>LOC10192692<br/>6</b> | uncharacterized LOC101926926                                                |
| 10015168<br>4 | <b>RNU6ATAC</b>          | RNA, U6atac small nuclear (U12-dependent splicing)                          |
| 140766        | <b>ADAMTS14</b>          | ADAM metallopeptidase with thrombospondin type 1 motif, 14                  |
| 81930         | <b>KIF18A</b>            | kinesin family member 18A                                                   |
| 79733         | <b>E2F8</b>              | E2F transcription factor 8                                                  |
| 9768          | <b>KIAA0101</b>          | KIAA0101                                                                    |
| 8294          | <b>HIST1H4I</b>          | histone cluster 1, H4i                                                      |
| 729852        | <b>RPA3OS</b>            | RPA3 opposite strand                                                        |
| 79075         | <b>DSCC1</b>             | DNA replication and sister chromatid cohesion 1                             |
| 51278         | <b>IER5</b>              | immediate early response 5                                                  |
| 407008        | <b>MIR223</b>            | microRNA 223                                                                |
| 6241          | <b>RRM2</b>              | ribonucleotide reductase M2                                                 |
| 23244         | <b>PDS5A</b>             | PDS5, regulator of cohesion maintenance, homolog A ( <i>S. cerevisiae</i> ) |
| 10558         | <b>SPTLC1</b>            | serine palmitoyltransferase, long chain base subunit 1                      |
| 10030273<br>9 | <b>PCNA-AS1</b>          | PCNA antisense RNA 1                                                        |
| 348793        | <b>WDR53</b>             | WD repeat domain 53                                                         |
| 284454        | <b>LOC284454</b>         | uncharacterized LOC284454                                                   |
| 3843          | <b>IPO5</b>              | importin 5                                                                  |
| 5427          | <b>POLE2</b>             | polymerase (DNA directed), epsilon 2, accessory subunit                     |
| 23082         | <b>PPRC1</b>             | peroxisome proliferator-activated receptor gamma, coactivator-related 1     |
| 23595         | <b>ORC3</b>              | origin recognition complex, subunit 3                                       |
| 79665         | <b>DHX40</b>             | DEAH (Asp-Glu-Ala-His) box polypeptide 40                                   |
| 89894         | <b>TMEM116</b>           | transmembrane protein 116                                                   |
| 79892         | <b>MCMBP</b>             | minichromosome maintenance complex binding protein                          |
| 11201         | <b>POLI</b>              | polymerase (DNA directed) iota                                              |
| 4521          | <b>NUDT1</b>             | nudix (nucleoside diphosphate linked moiety X)-type motif 1                 |
| 10030221<br>3 | <b>MIR1181</b>           | microRNA 1181                                                               |
| 113622        | <b>ADPRHL1</b>           | ADP-ribosylhydrolase like 1                                                 |
| 4507          | <b>MTAP</b>              | methylthioadenosine phosphorylase                                           |
| 5424          | <b>POLD1</b>             | polymerase (DNA directed), delta 1, catalytic subunit                       |
| 9134          | <b>CCNE2</b>             | cyclin E2                                                                   |
| 25914         | <b>RTTN</b>              | rotatin                                                                     |
| 9955          | <b>HS3ST3A1</b>          | heparan sulfate (glucosamine) 3-O-sulfotransferase 3A1                      |
| 56941         | <b>HMCE5</b>             | 5-hydroxymethylcytosine (hmC) binding, ES cell-specific                     |

|        |               |                                                       |
|--------|---------------|-------------------------------------------------------|
| 5426   | <b>POLE</b>   | polymerase (DNA directed), epsilon, catalytic subunit |
| 10036  | <b>CHAF1A</b> | chromatin assembly factor 1, subunit A (p150)         |
| 1039   | <b>CDR2</b>   | cerebellar degeneration-related protein 2, 62kDa      |
| 84939  | <b>MUM1</b>   | melanoma associated antigen (mutated) 1               |
| 84219  | <b>WDR24</b>  | WD repeat domain 24                                   |
| 124222 | <b>PAQR4</b>  | progesterone and adipoQ receptor family member IV     |
| 163    | <b>AP2B1</b>  | adaptor-related protein complex 2, beta 1 subunit     |
| 27131  | <b>SNX5</b>   | sorting nexin 5                                       |
| 9401   | <b>RECQL4</b> | RecQ protein-like 4                                   |
| 119587 | <b>CPXM2</b>  | carboxypeptidase X (M14 family), member 2             |
| 64782  | <b>AEN</b>    | apoptosis enhancing nuclease                          |

## **SUPPLEMENTARY FIGURES**

### **Supplementary Figure 1, Related to Figure 1: Transcription factor networks affected by NASTRp in each different LC cell line.**

(A-E) Differential expression of transcription factors and their target genes by NASTRp treatment in A549, H441, H1975, H520, and H1703 cells. Red: upregulated genes, green: downregulated genes, square: transcription factor, circle: target gene, cyan border: negative enrichment of targets, yellow: positive enrichment. Thickness of border is proportional to the magnitude of enrichment.



## B. H441

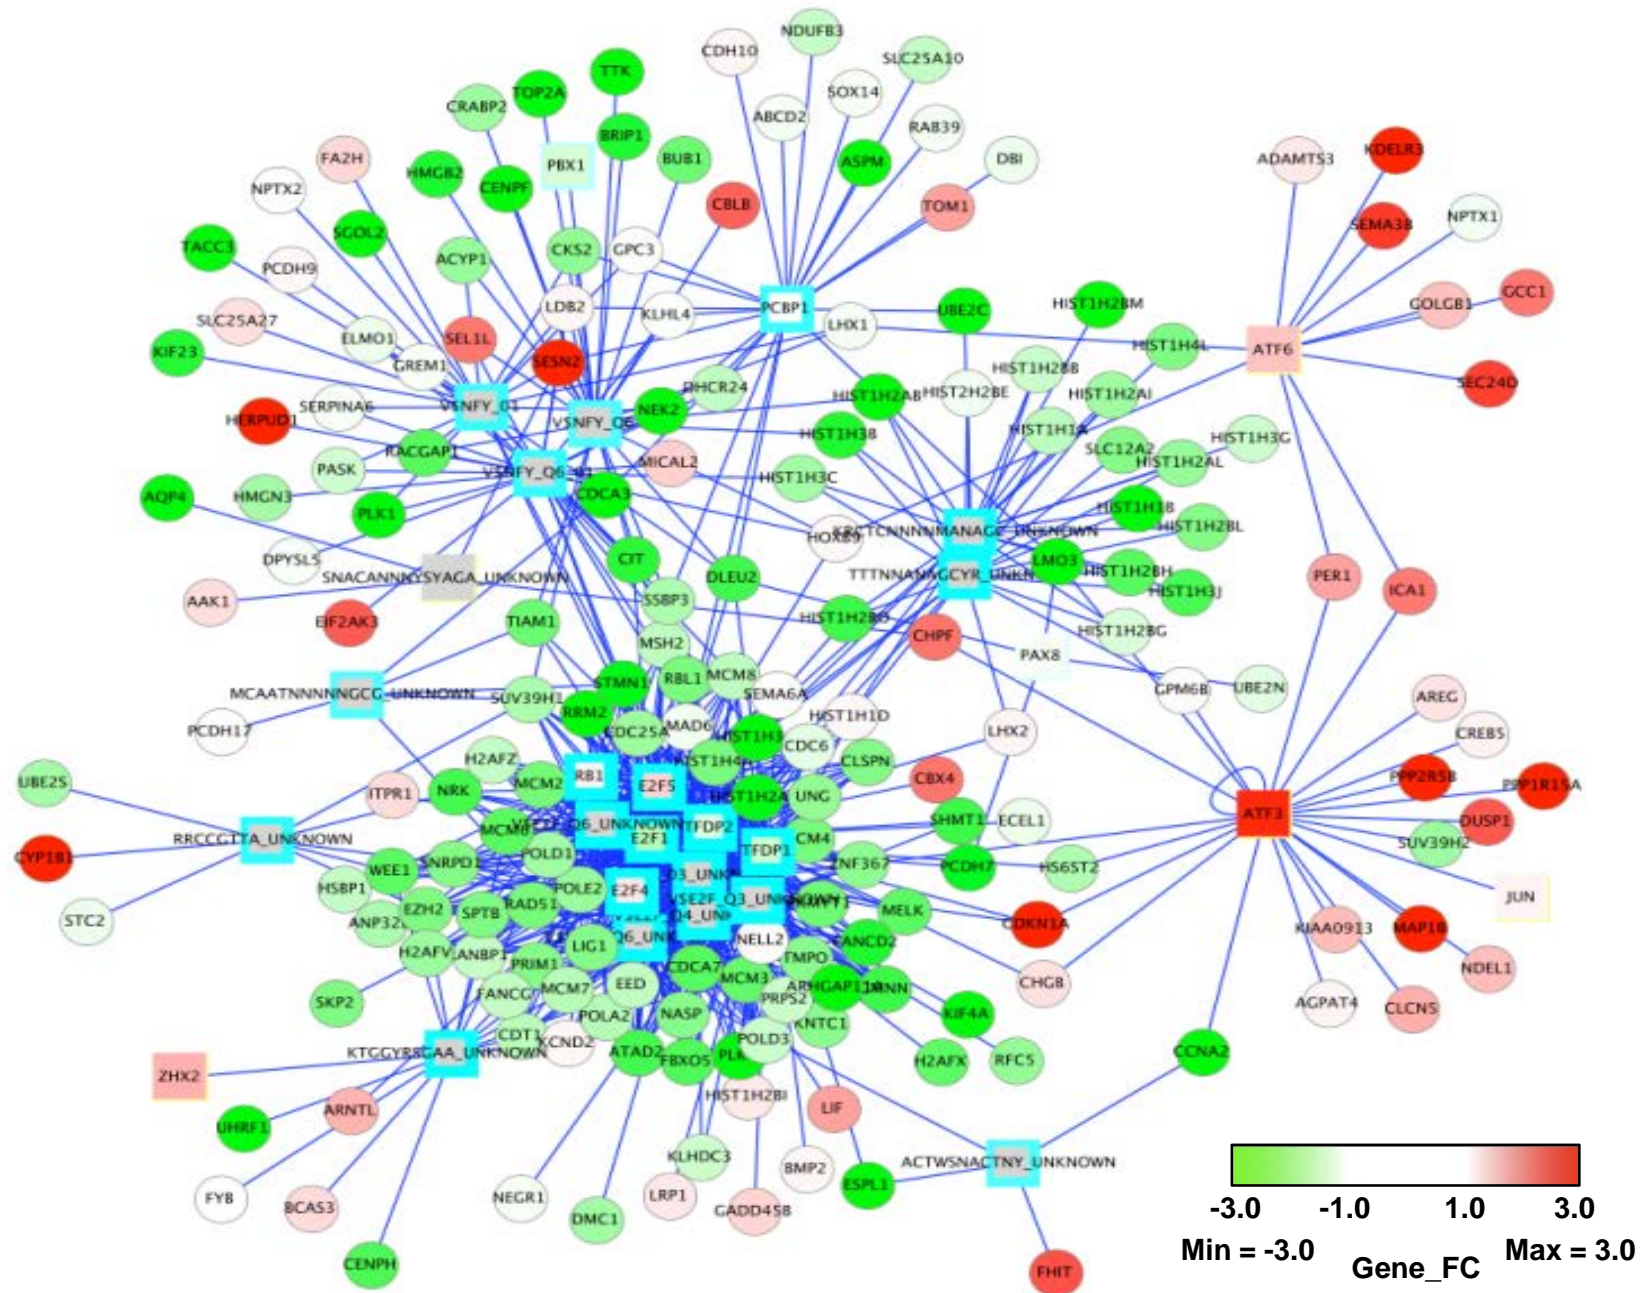

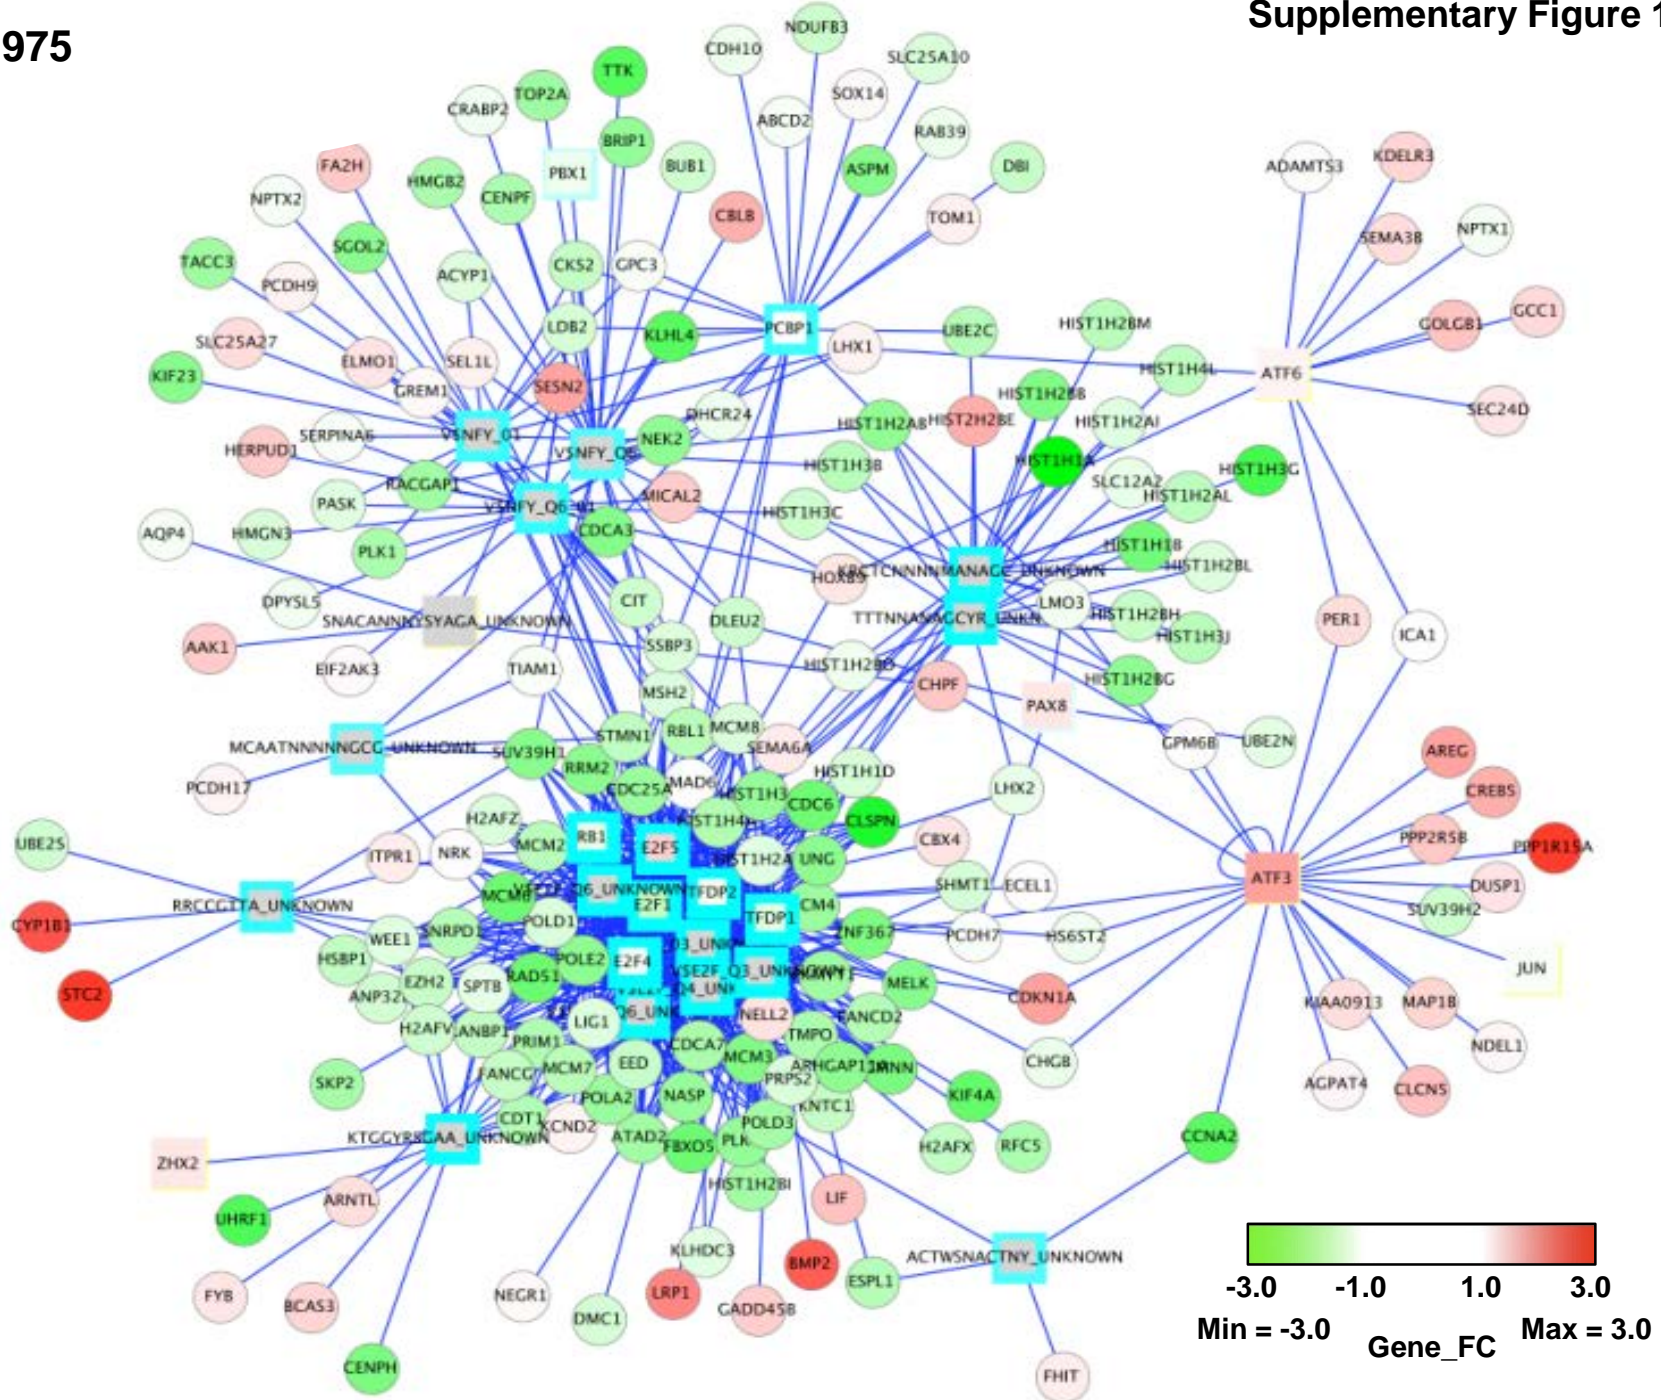



## D. H520

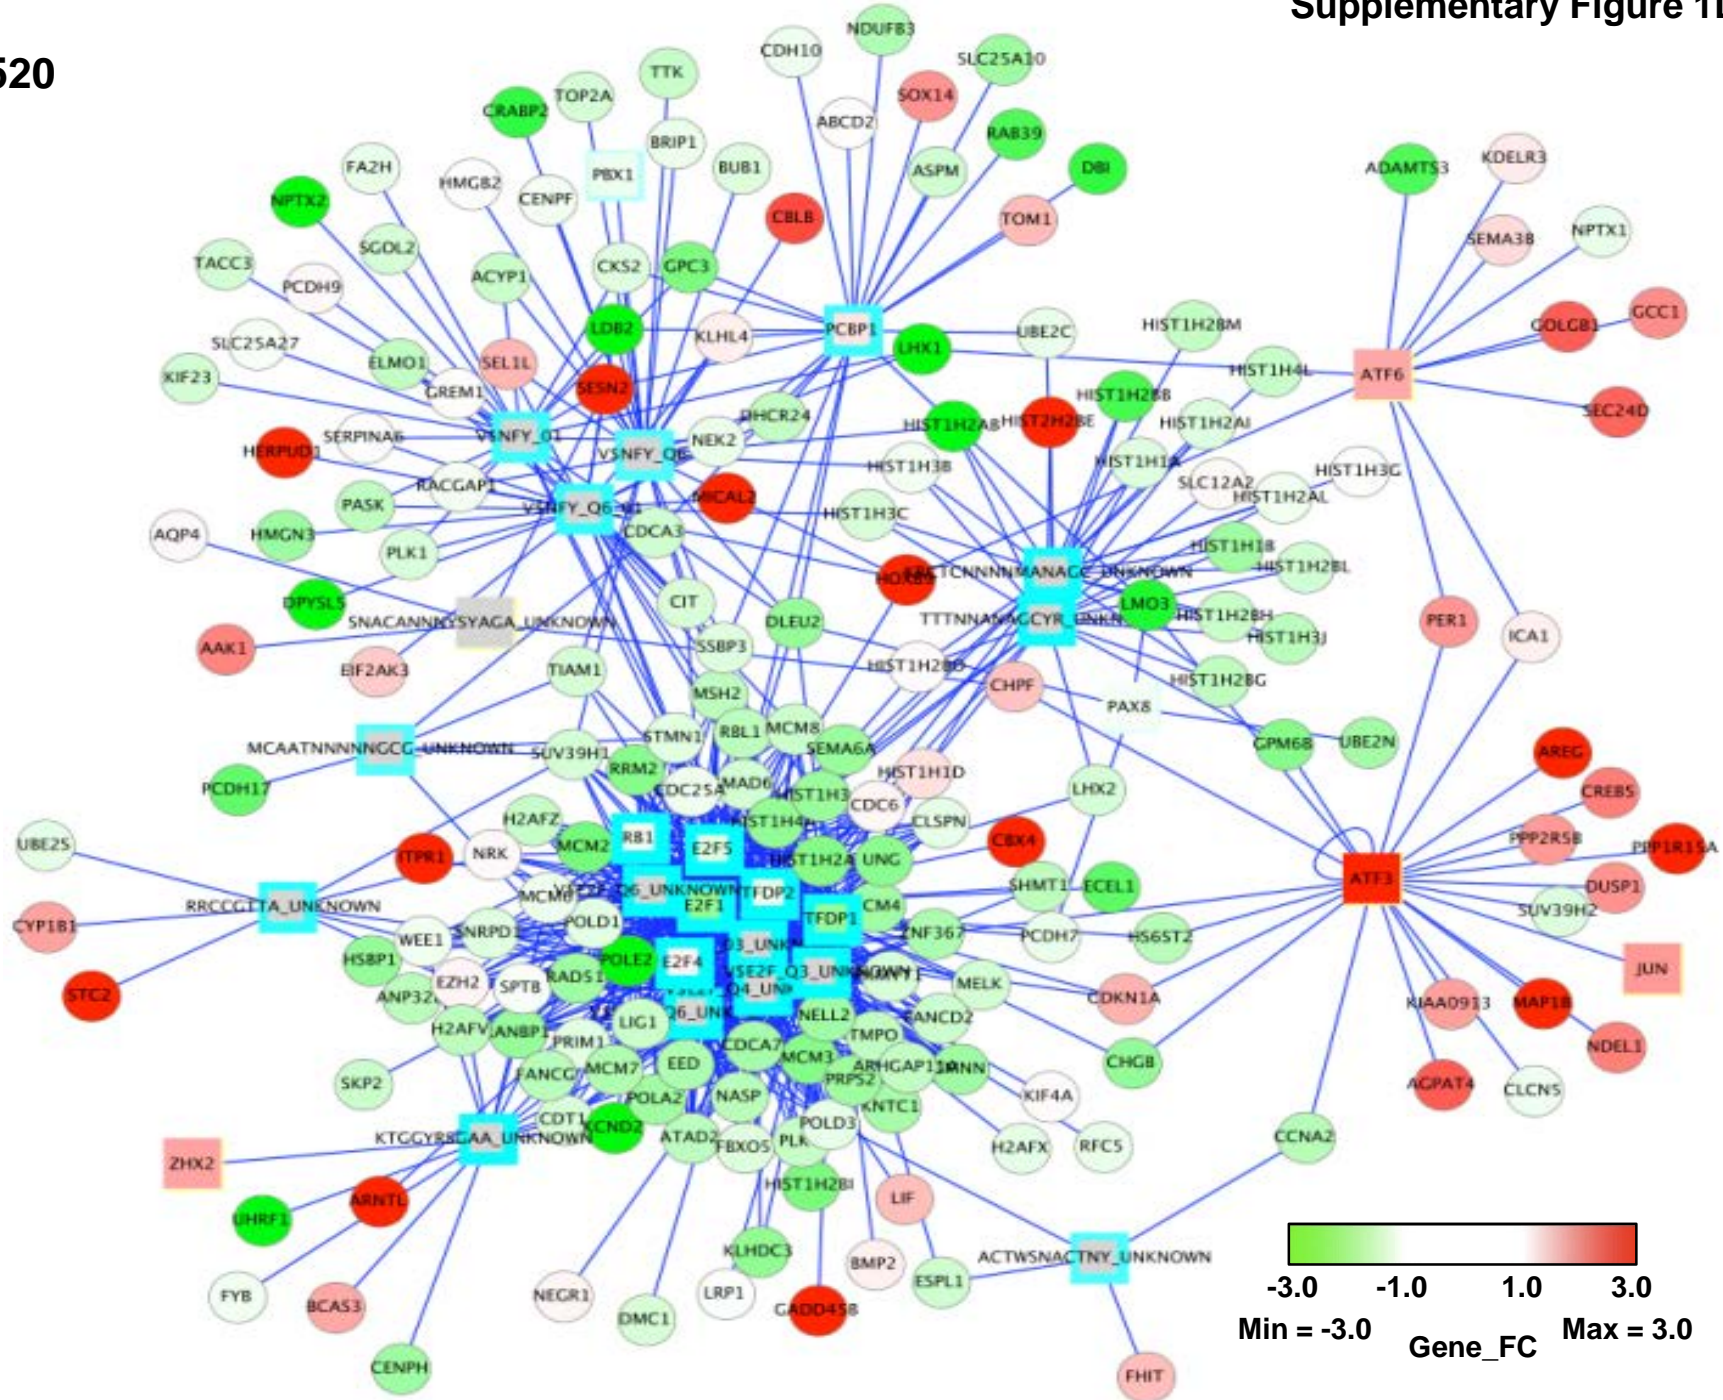

## E. H1703

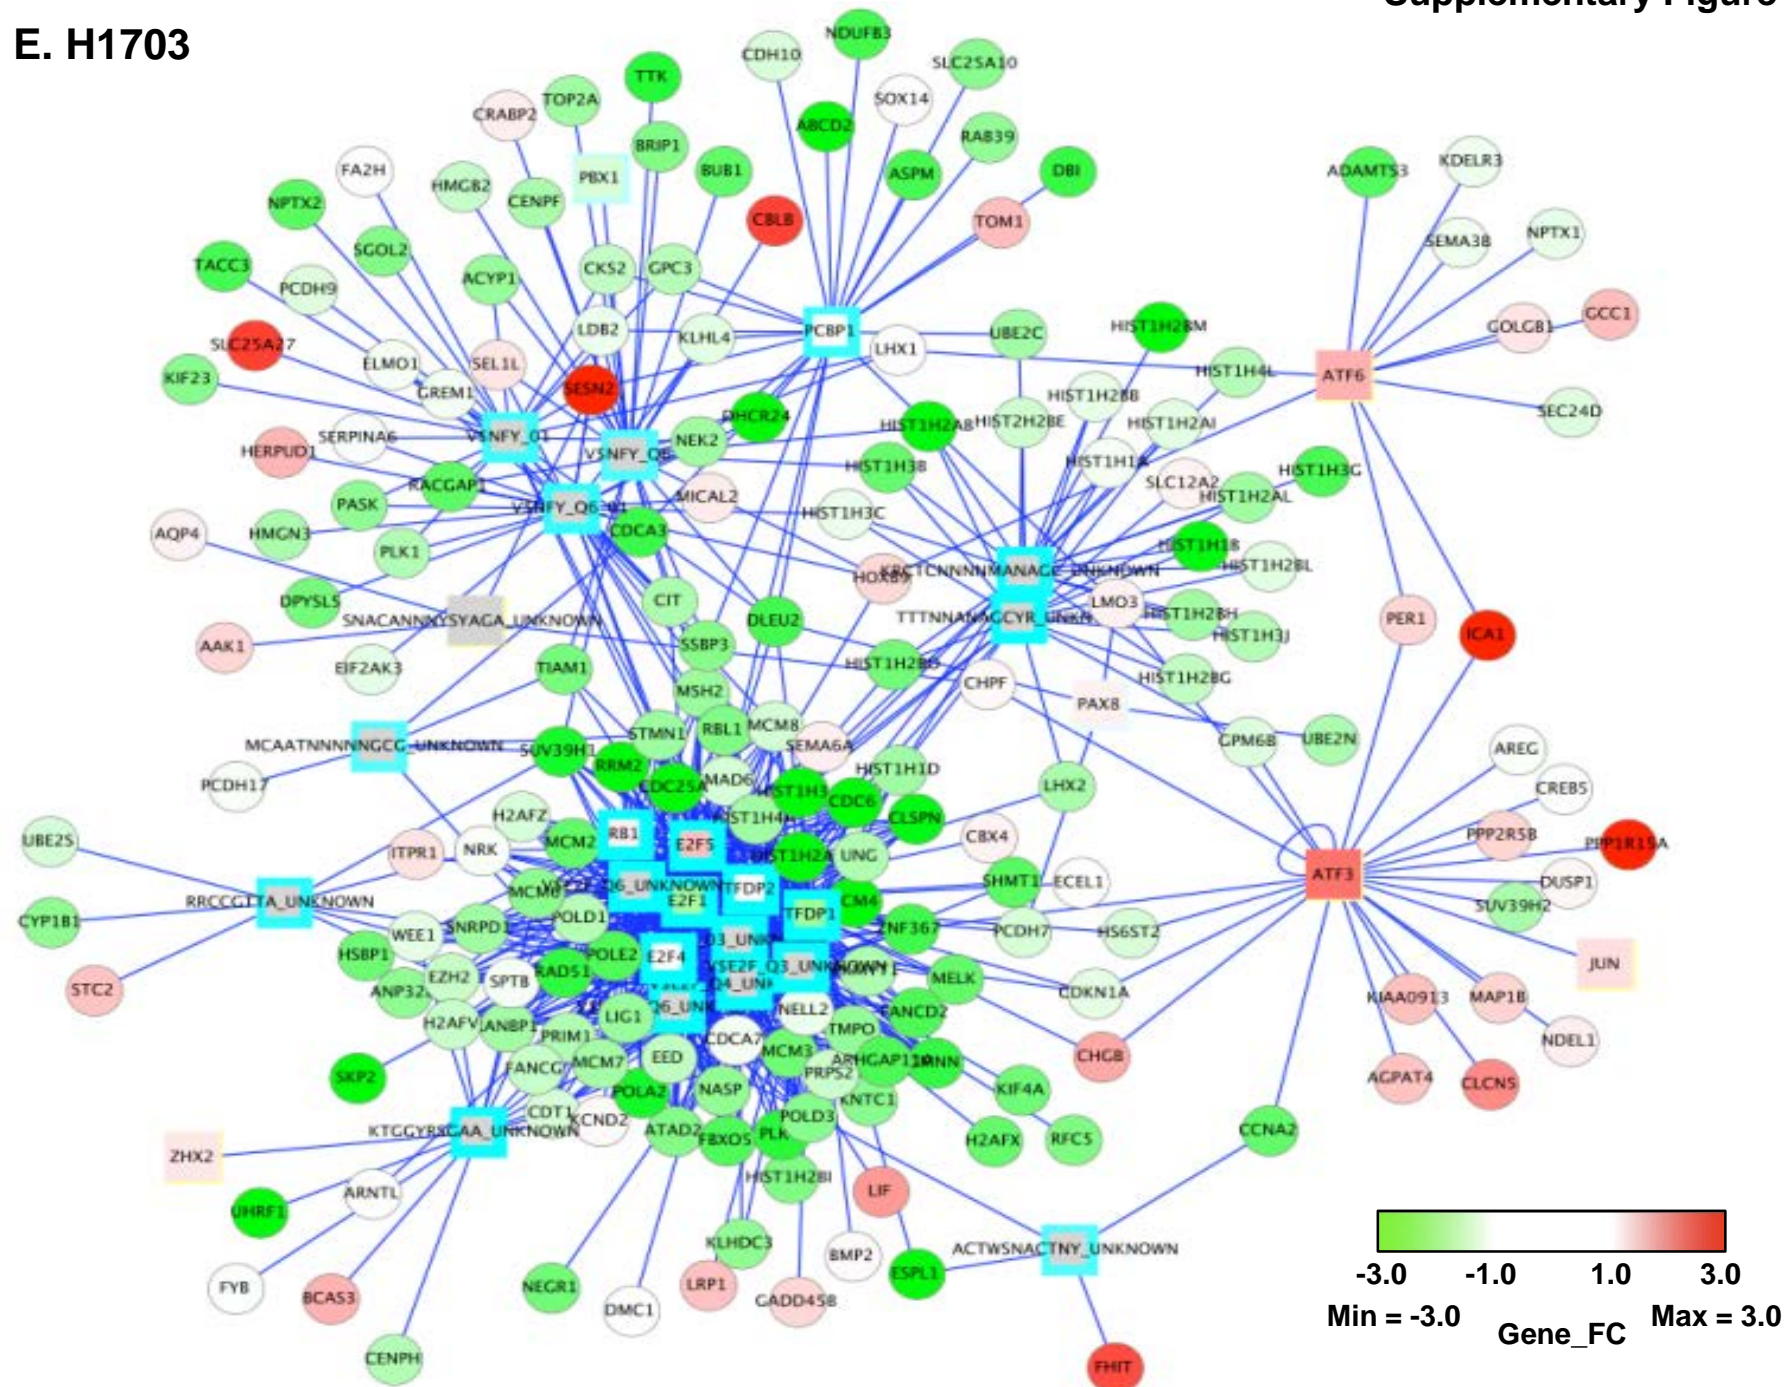

**Supplementary Figure 2, Related to Figure 2 and 3: The validation of siRNAs on expression of E2Fs in LC cells.**

(A) Each of the indicated cells were transiently transfected with siRNAs (40 nM, each) for 48 h and performed by qPCR analysis. L32 was used as a control. (B) Each of the indicated cells were transfected with E2F1 siRNA or E2F2 siRNA (10 and 50 nM, each) for 72 h, followed by western blot analysis. (C) Each of the indicated cells were transfected with E2F8 siRNA-1 (10 and 50 nM, each) for 72 h, followed by western blot analysis. (D) Two different E2F8 siRNAs were confirmed the effect of E2F8 knockdown in LC cells. Each of the indicated cells were transfected with control siRNA, E2F8 siRNA-1 or E2F8 siRNA-2 (10 and 50 nM, each) for 72 h, followed by western blot analysis. Further *in vitro* experiments were performed using E2F8 siRNA-1.

A

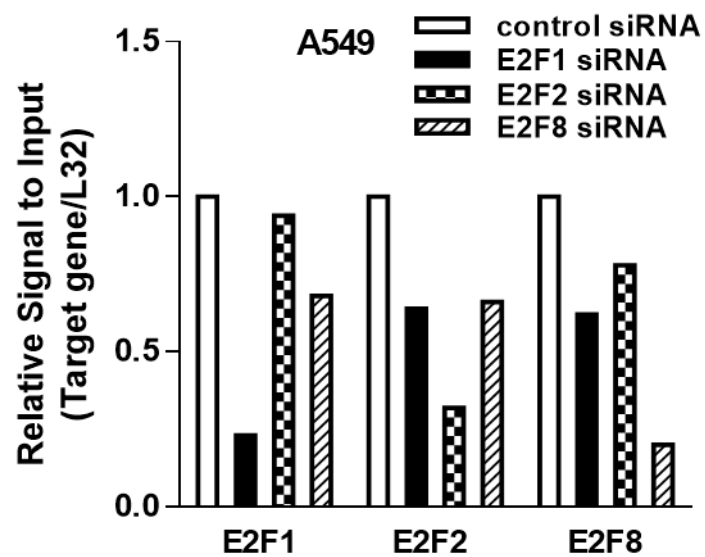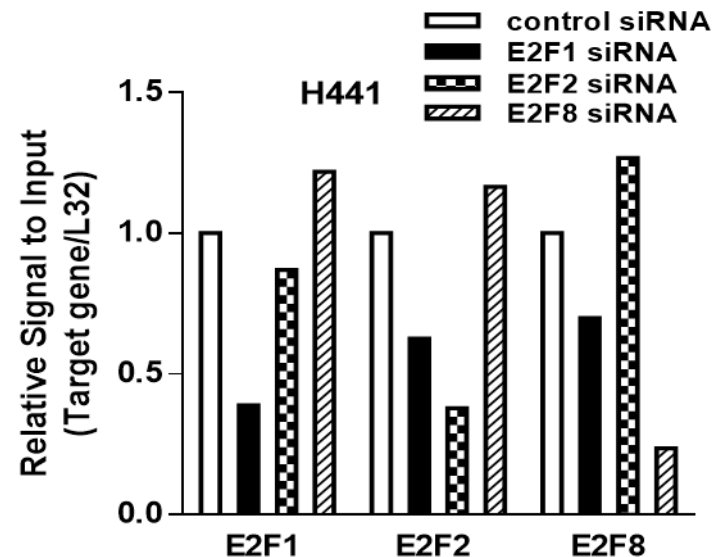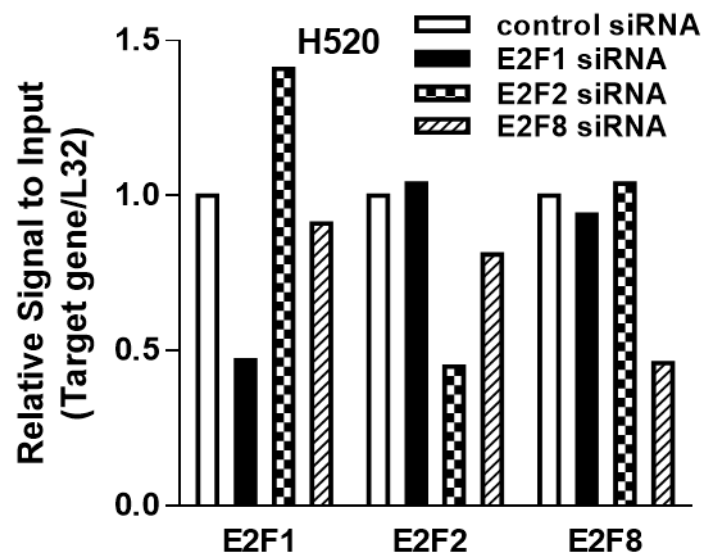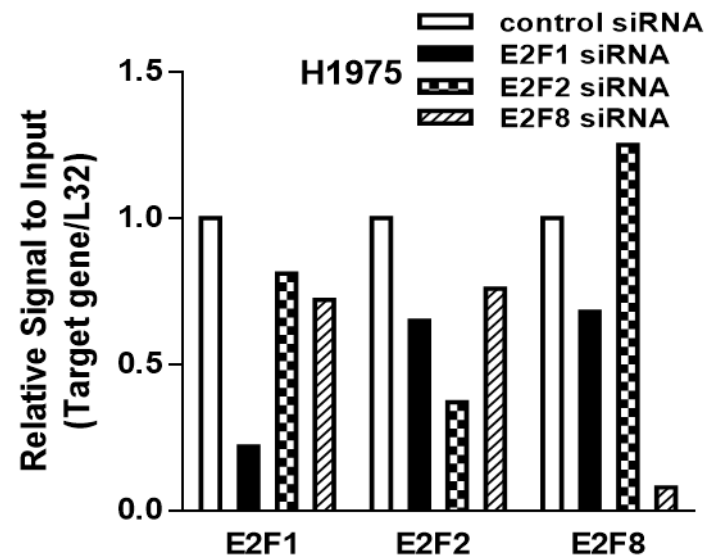

**B**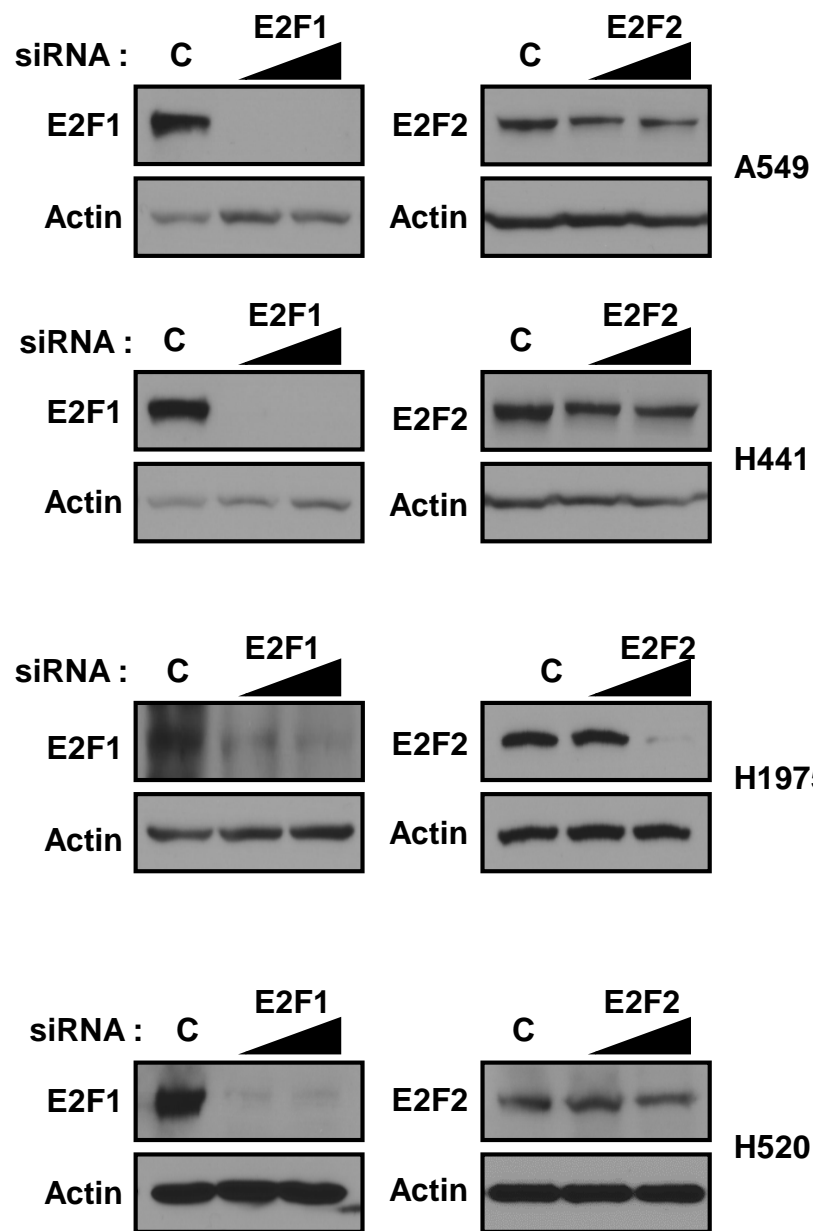**C**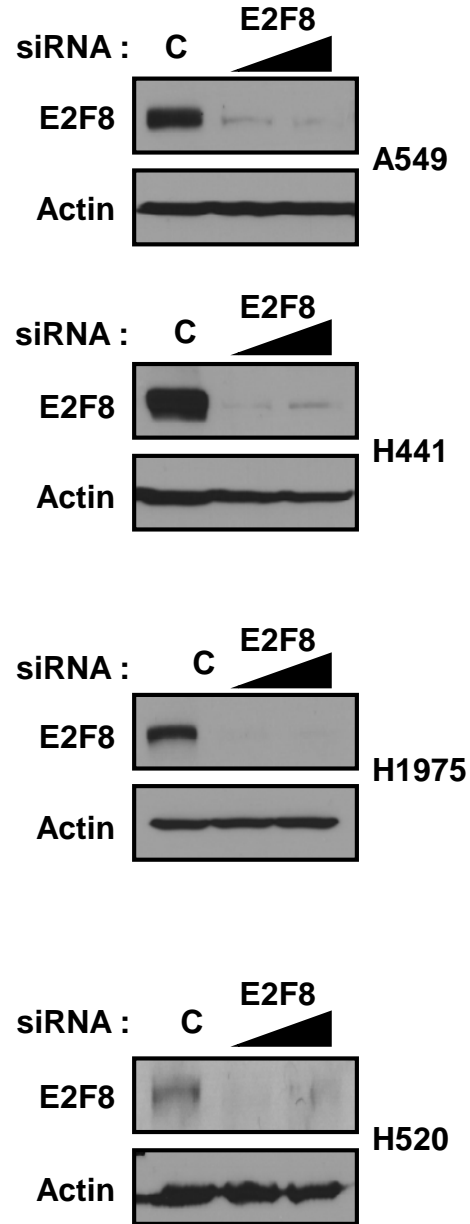**D**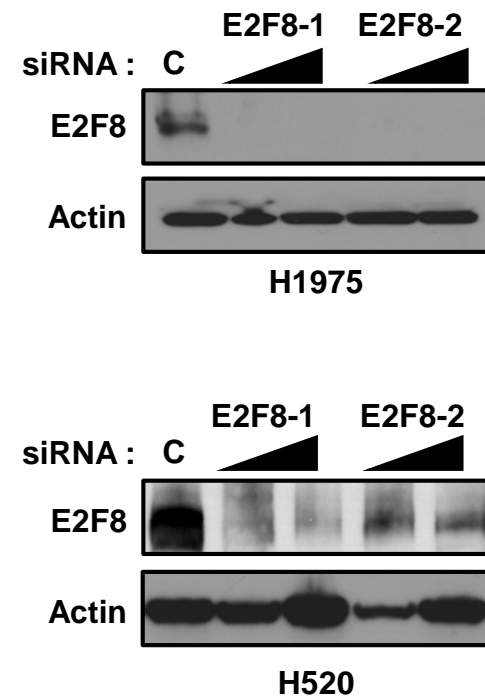

**Supplementary Figure 3, Related to Figure 3: The effect of E2F8 depletion on the cell cycle progression.**

(A) A549 cells were transfected with control siRNA or E2F8 siRNA (20 nM) for 24 h. The cells were stained with propidium iodide and analyzed by flow cytometry. Percentage of cells in each phase of the cell cycle represent the corresponding histograms. (B) A549-shctrl and A549-shE2F8 cells were plated in 10 cm dishes for 3 days and stained with propidium iodide analyzed by flow cytometry. Inner panels show the increased number of contracted cells in A549-shE2F8 compared to its control cells and percentage of cells in each phase of the cell cycle represent the corresponding histograms.

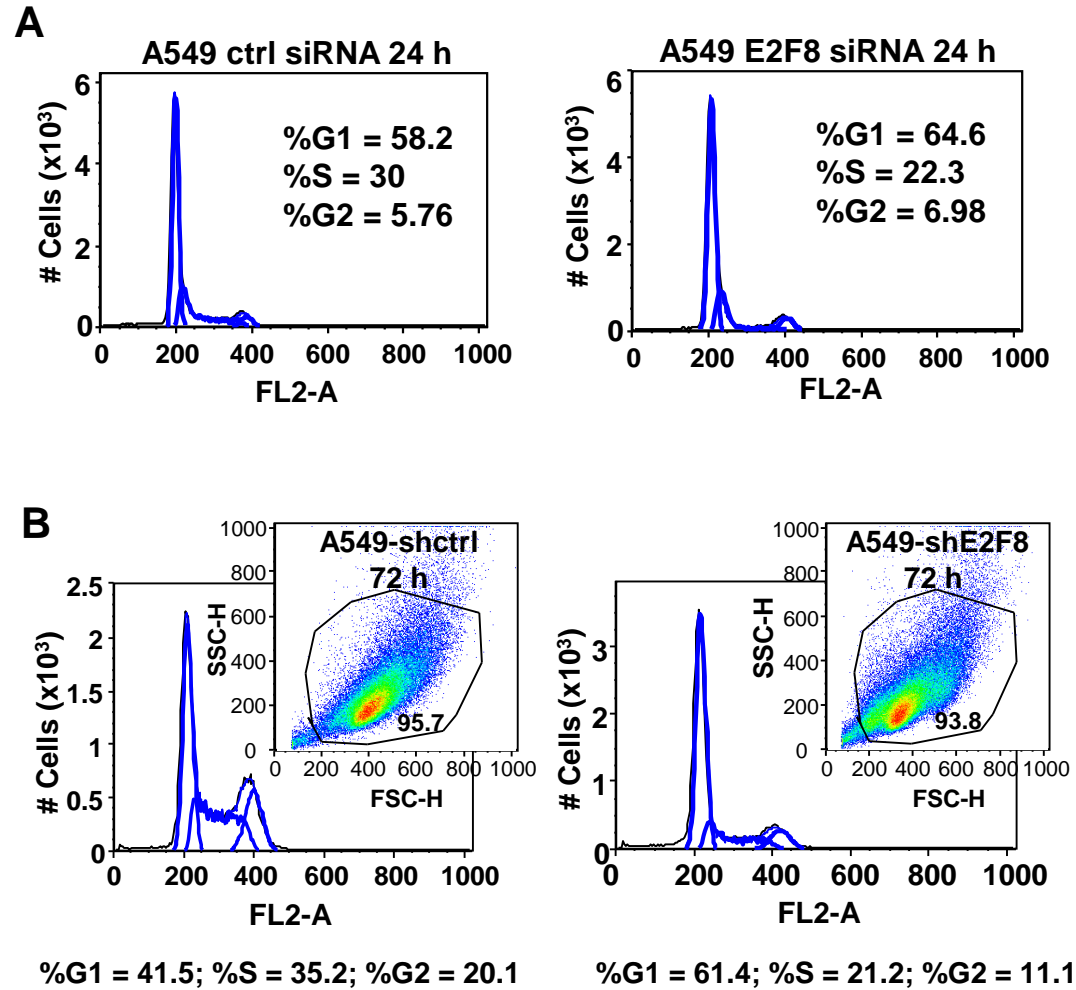

**Supplementary Figure 4, Related to Figure 3: The effect of E2F8 depletion on the DNA damage response in LC cells.**

(A) Effect of E2F8 knockdown on the incidence of p-H2AX foci in H520 cells. Representative photographs show immunofluorescence staining of p-H2AX after 48 h control siRNA or E2F8 siRNA treatment (20 nM). Scale bar, 100  $\mu$ m. (B) DNA damage as detected using an alkaline comet assay. H520 cells were transfected with control siRNA (40 nM) or E2F8 siRNA (10 or 40 nM) for 24 h. The panel shows representative images of cells and quantification of the tail moment of 12 randomly selected cells per slide. Two-sided *t*-test. \*,  $P < 0.001$ .



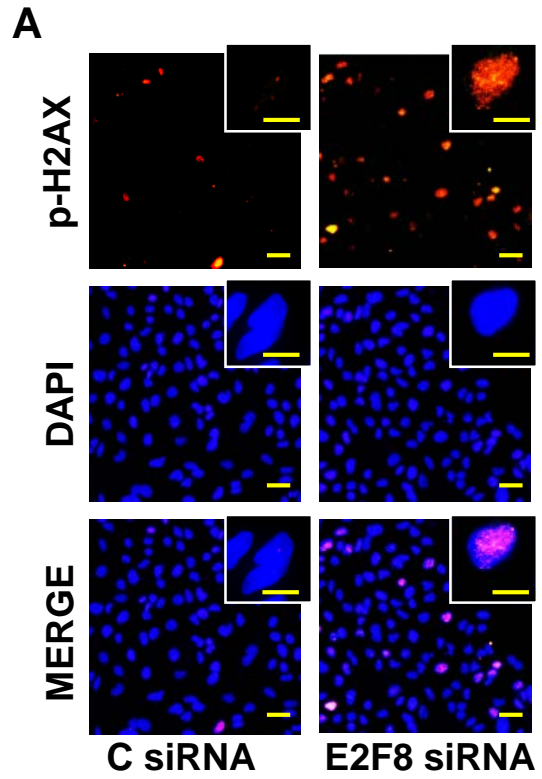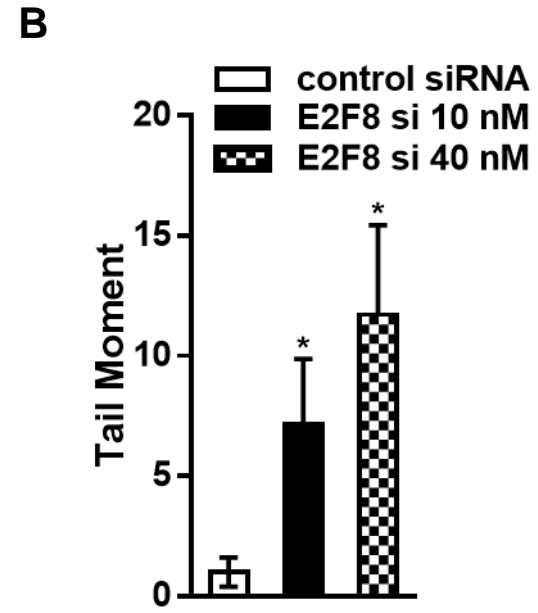

**Supplementary Figure 5, Related to Figure 3: The effect of E2F8 depletion on the cell growth in A549 cells and lung fibroblasts cell lines.**

(A) Effect of E2F8 stable knockdown on LC cell proliferation. A549-shctrl, A549-shE2F8-1, and A549-shE2F8-3 cells were selected with puromycin (1.5  $\mu\text{g/ml}$ ) and the cells were performed by western blot analysis to confirm the expression levels of E2F8 and UHRF1. The cells were plated in 96 wells ( $2 \times 10^3$ / well) for 5 days and analyzed cell proliferation using MTT assay. (B) Again, the cells were seeded in 12 wells with low density ( $1 \times 10^3$ / well) and incubated for 7 days. The cells were fixed with 10% formalin and stained with crystal violet. (C) Effect of E2F8 stable knockdown on cell proliferation in human lung fibroblasts cell lines. MRC5-shctrl, MRC5-shE2F8-1, BJ1-shctrl, and BJ1-shE2F8-1 cells were selected with puromycin (1  $\mu\text{g/ml}$ ) and the cells were plated in 96 wells ( $2 \times 10^3$ / well) and analyzed cell proliferation using MTT assay at each day after cell seeding (top). The cells were performed by western blot analysis to confirm the expression level of E2F8 (bottom). Mean  $\pm$  SD in three independent experiments. Two-sided *t*-test. \*,  $P < 0.001$ .

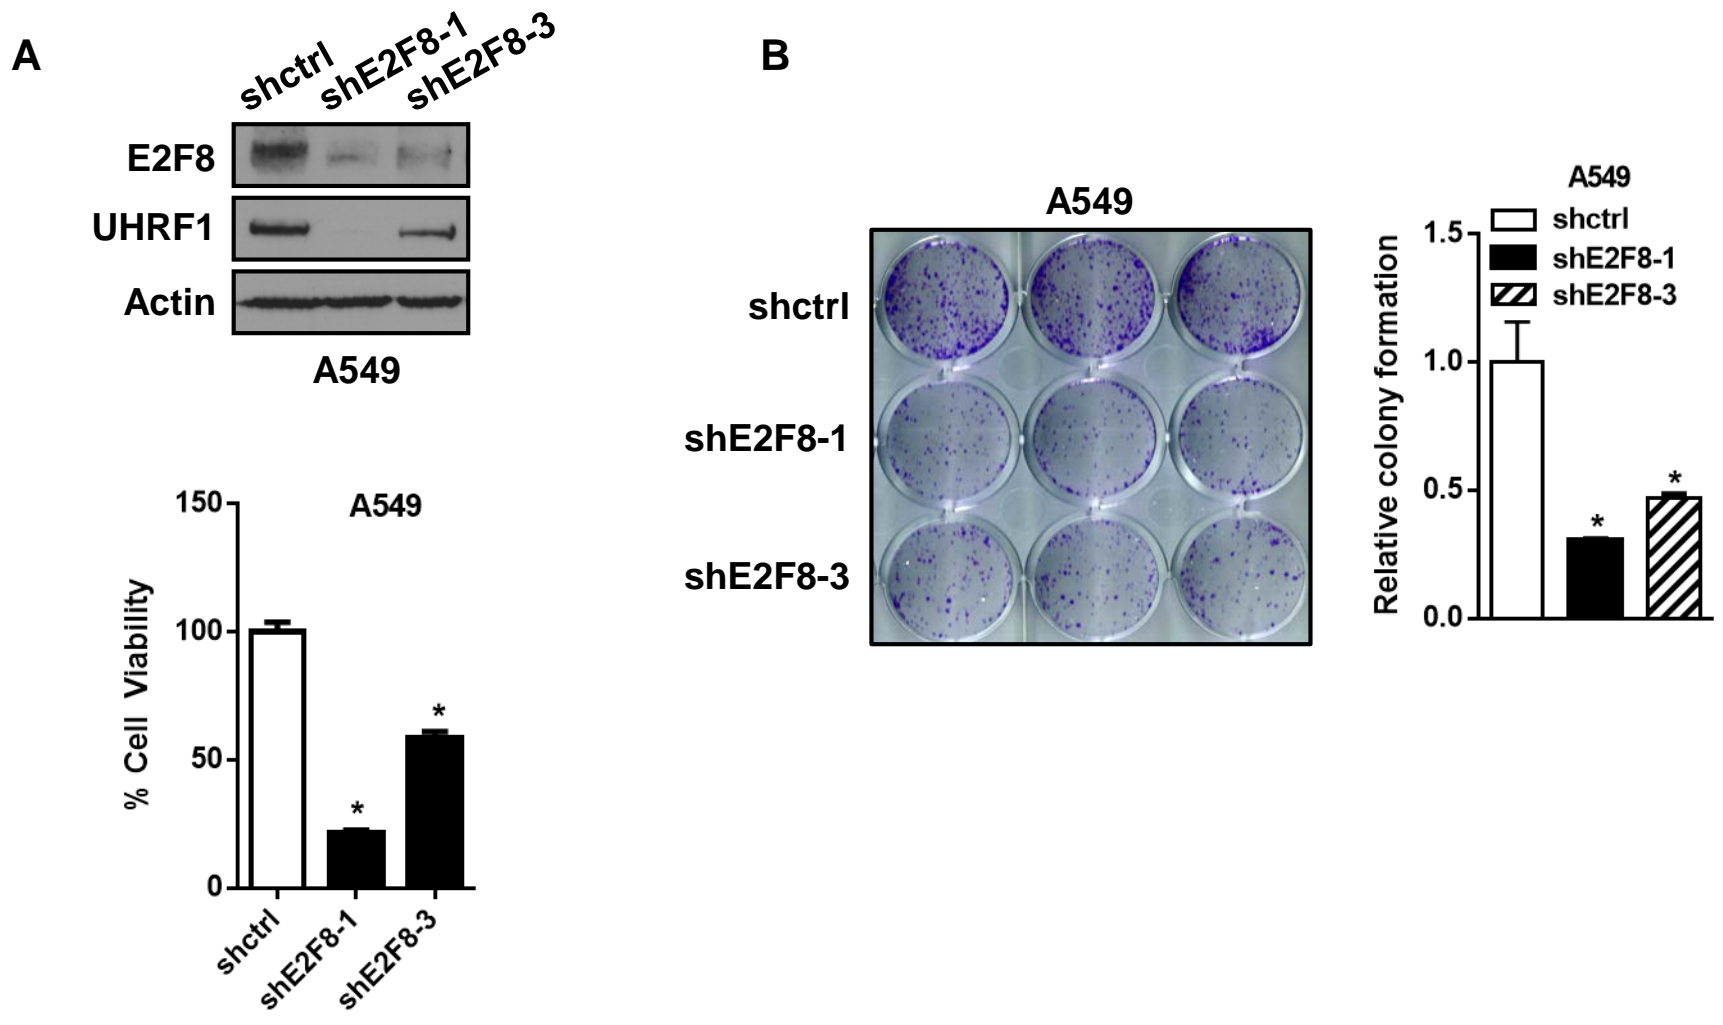

C

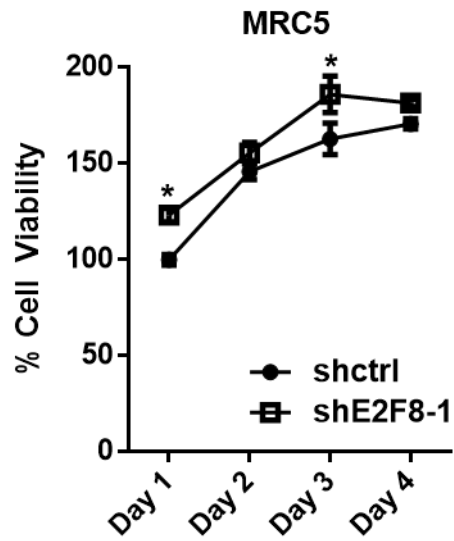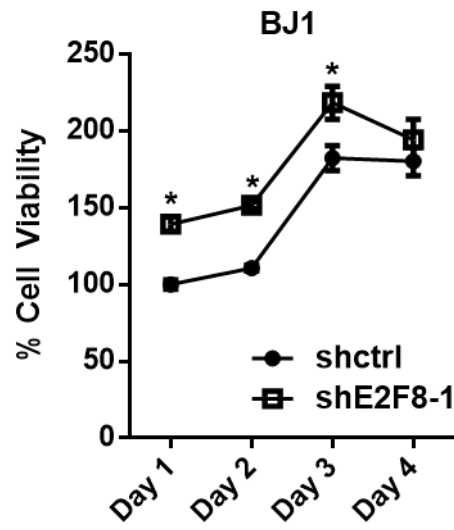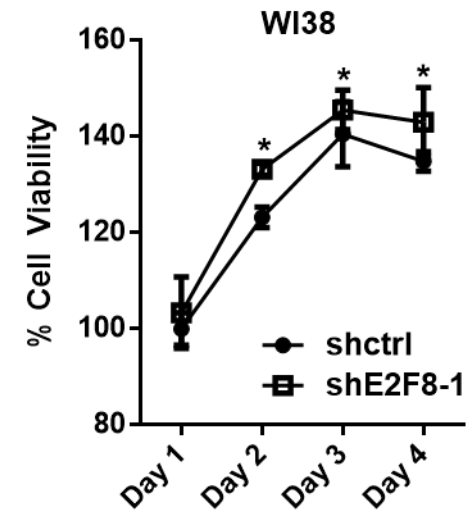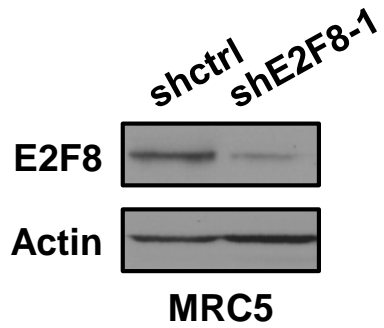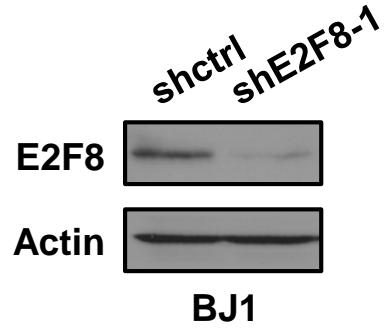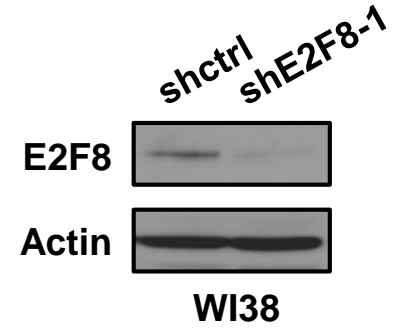

**Supplementary Figure 6, Related to Figure 3: The effect of E2F8 overexpression on cell proliferation.**

(A) Effect of E2F8 overexpression on cell proliferation in 1198 cells. The stable overexpression of E2F8 was confirmed by western blot analysis. 1000 cells were seeded in the 96-well plate and cultured for 72 h, followed by MTT assay. Two-sided *t*-test. \*,  $P < 0.001$ . (B) Effect of E2F8 overexpression on colony formation of 1198 cells. 1000 cells were seeded on the 6-well plate and cultured for 7 days. Mean  $\pm$  SD in three independent experiments. Two-sided *t*-test. \*,  $P < 0.001$ . (C-D) Effect of E2F8 overexpression in A549 cells. (C) The cells were established with stable overexpression of E2F8 and confirmed by western blot analysis. Overexpression of E2F8 was confirmed by its specific E2F8 siRNA. (D) Effect of E2F8 overexpression on colony formation of A549 cells. 1000 cells in each group were seeded on the 6-well plate and cultured for 7 days. Mean  $\pm$  SD in three independent experiments. Two-sided *t*-test. \*,  $P < 0.001$ .

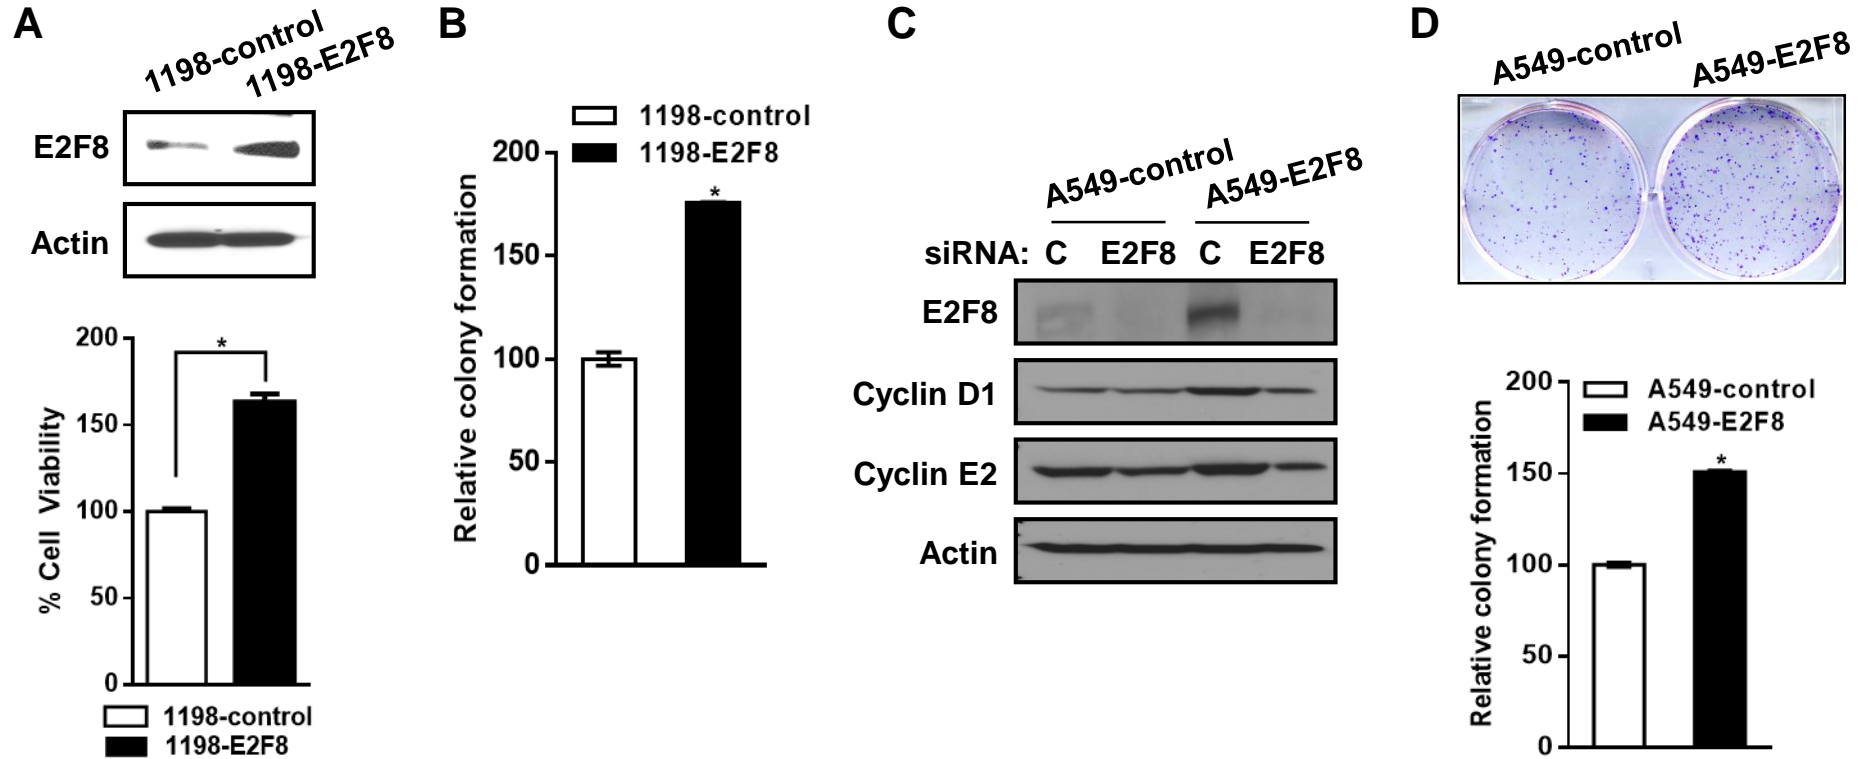

**Supplementary Figure 7, Related to Figure 4: Effects of E2F8 overexpression on LC prognosis.**

(A) Association of *E2F8* mRNA levels with tumor subtype grouped by stage (Hou Lung). Each data set was identified and the normalized (by ONCOMINE) data was obtained. The 25th–75th percentiles are indicated by a closed box with the median indicated by a line. (B) *E2F8* mRNA expression profile (RMA, log2) in 1,036 cancer cell lines (by CCLE; <http://www.broadinstitute.org/ccle/home>).

A

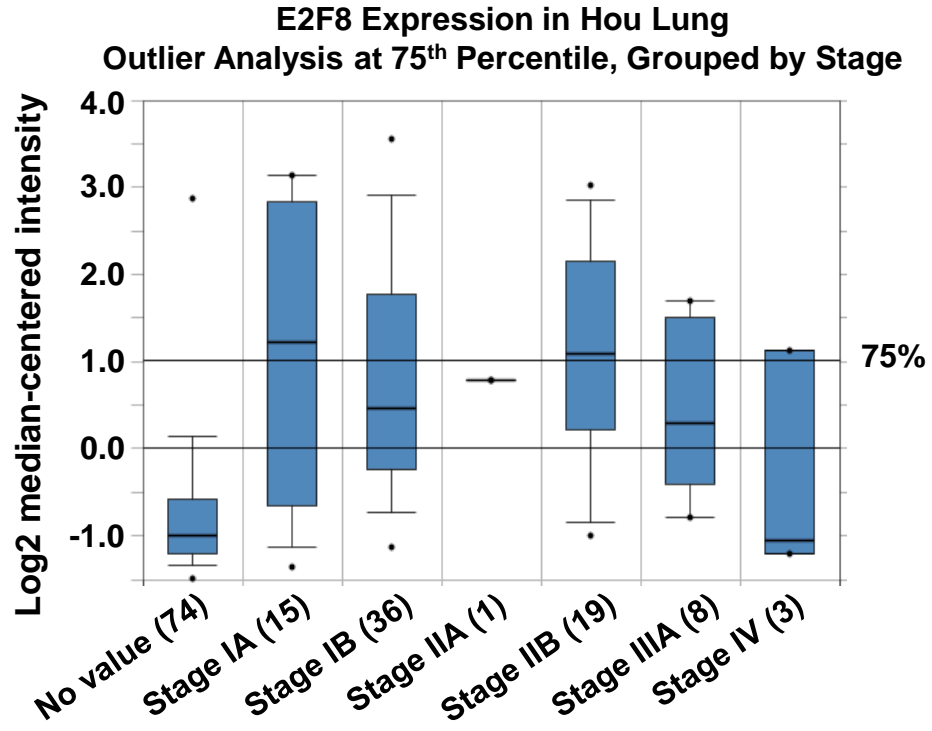



B

E2F8 - Entrez ID: 79733

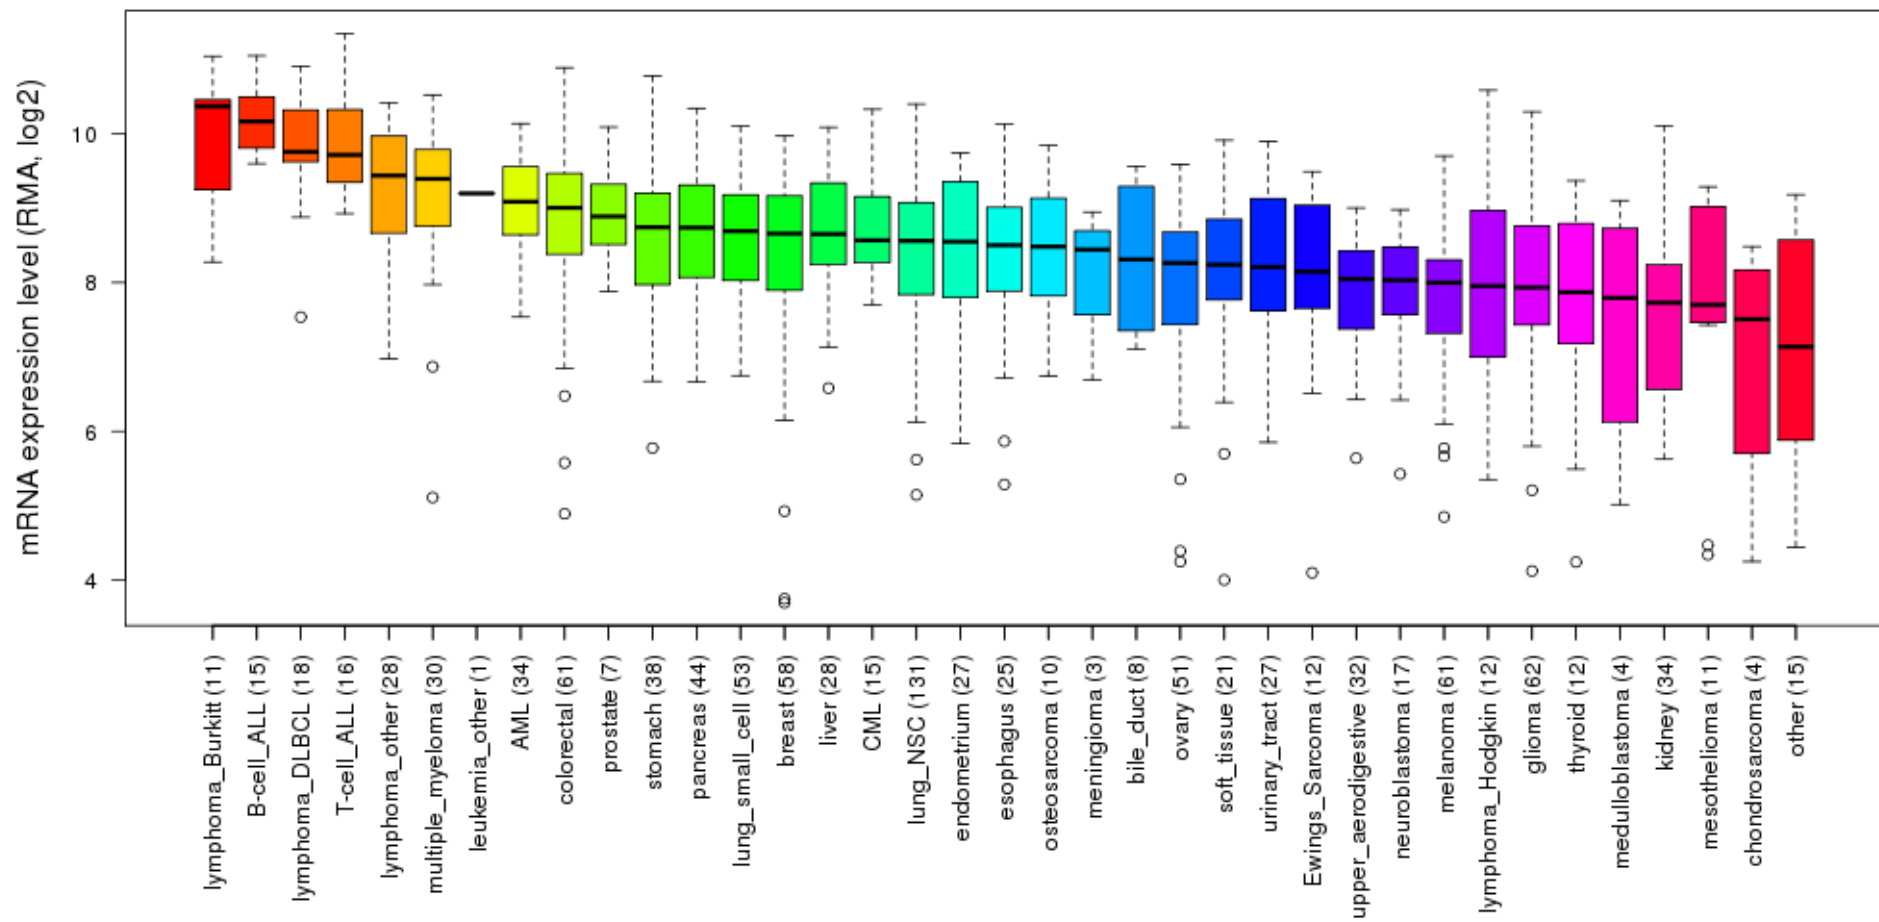

**Supplementary Figure 8, Related to Figure 5 and 6: Effects of E2F8 knockdown on the regulation of cyclins and UHRF1.**

(A) Effect of E2F8 knockdown on the expression of cyclins in three LC cell lines from the microarray data. Y axis = Fold change of siE2F8-treated vs. sicontrol-treated cells; X-axis = the individual genes.

(B) Indicated LC cells were transfected with control siRNA or E2F8 siRNA (40 nM, each) for 48 h and total RNAs were extracted, followed by qPCR using specific primers for each indicated gene. L32 was used as a control. Mean  $\pm$  SD in three independent experiments. Two-sided *t*-test. \*,  $P < 0.001$ .

(C) Effects of E2F8 knockdown on the protein level of each cyclin and UHRF1 in LC cells. Indicated LC cells were transfected with control siRNA or E2F8 siRNA (40 nM, each) for 72 h and performed by western blot analysis.

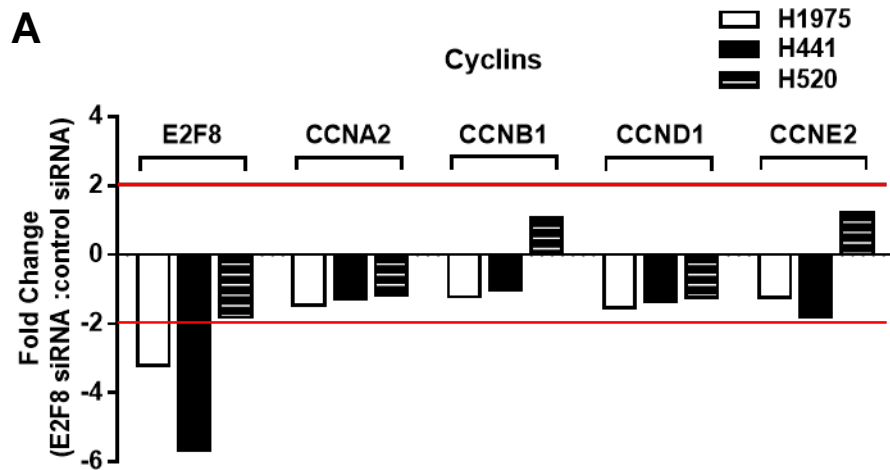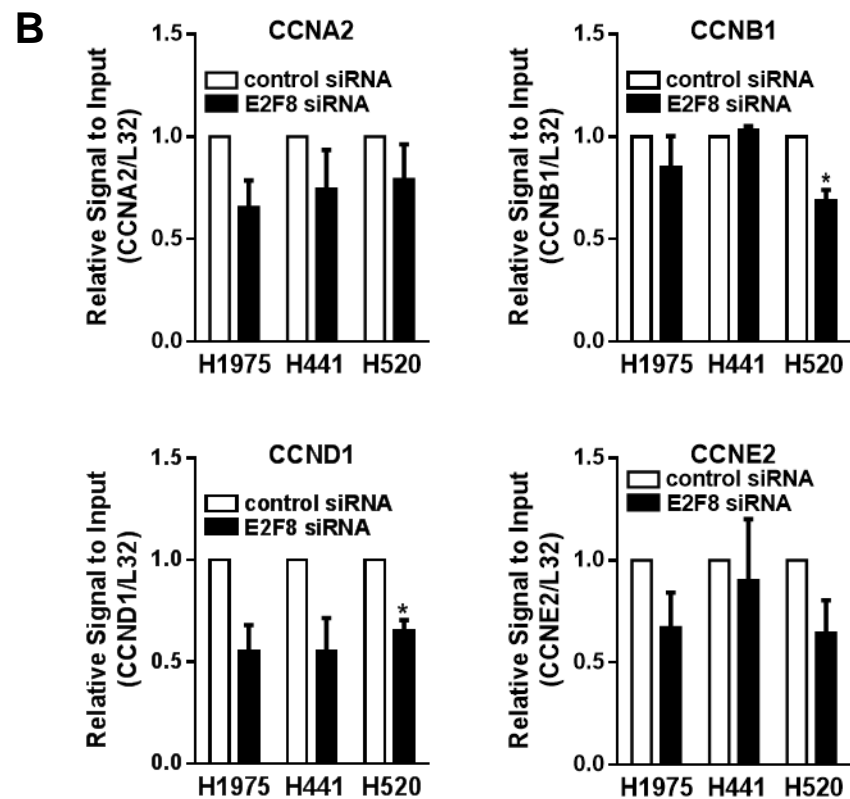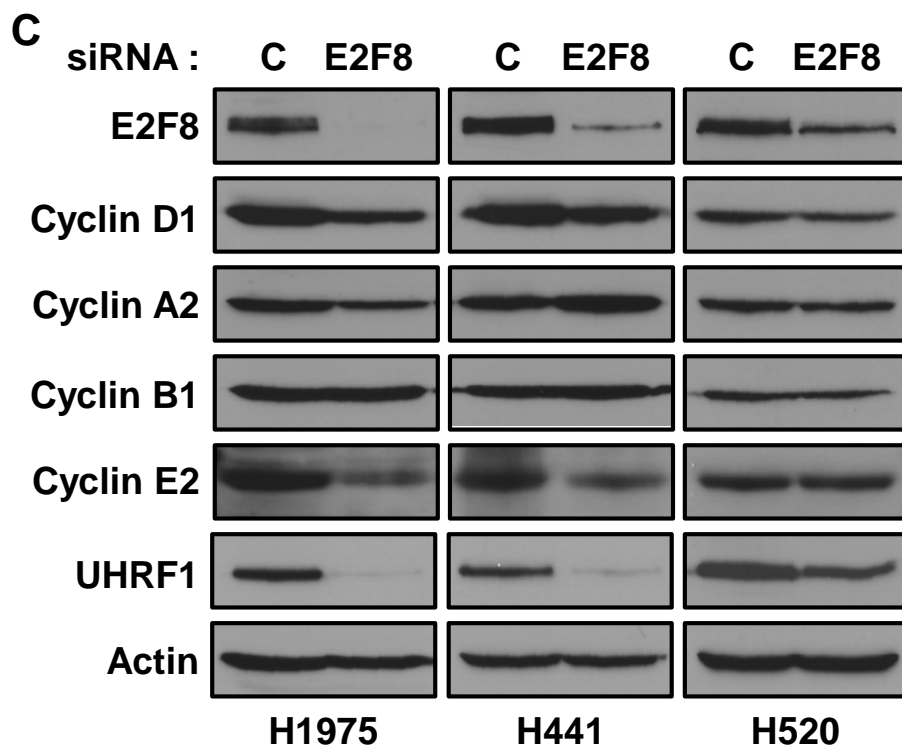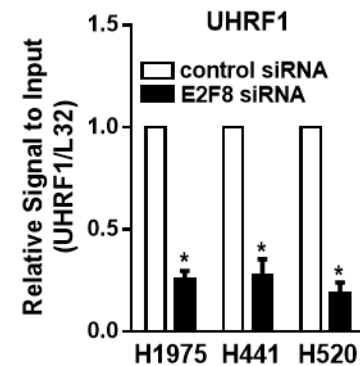

**Supplementary Figure 9, Related to Figure 5: The validation of upregulated genes by E2F8 knockdown.**

Each of the indicated cells were transiently transfected with control siRNA or E2F8 siRNA (40 nM, each) for 48 h. Based on the microarray data, selected upregulated genes by E2F8 knockdown was confirmed by qPCR analysis. L32 was used as a control.

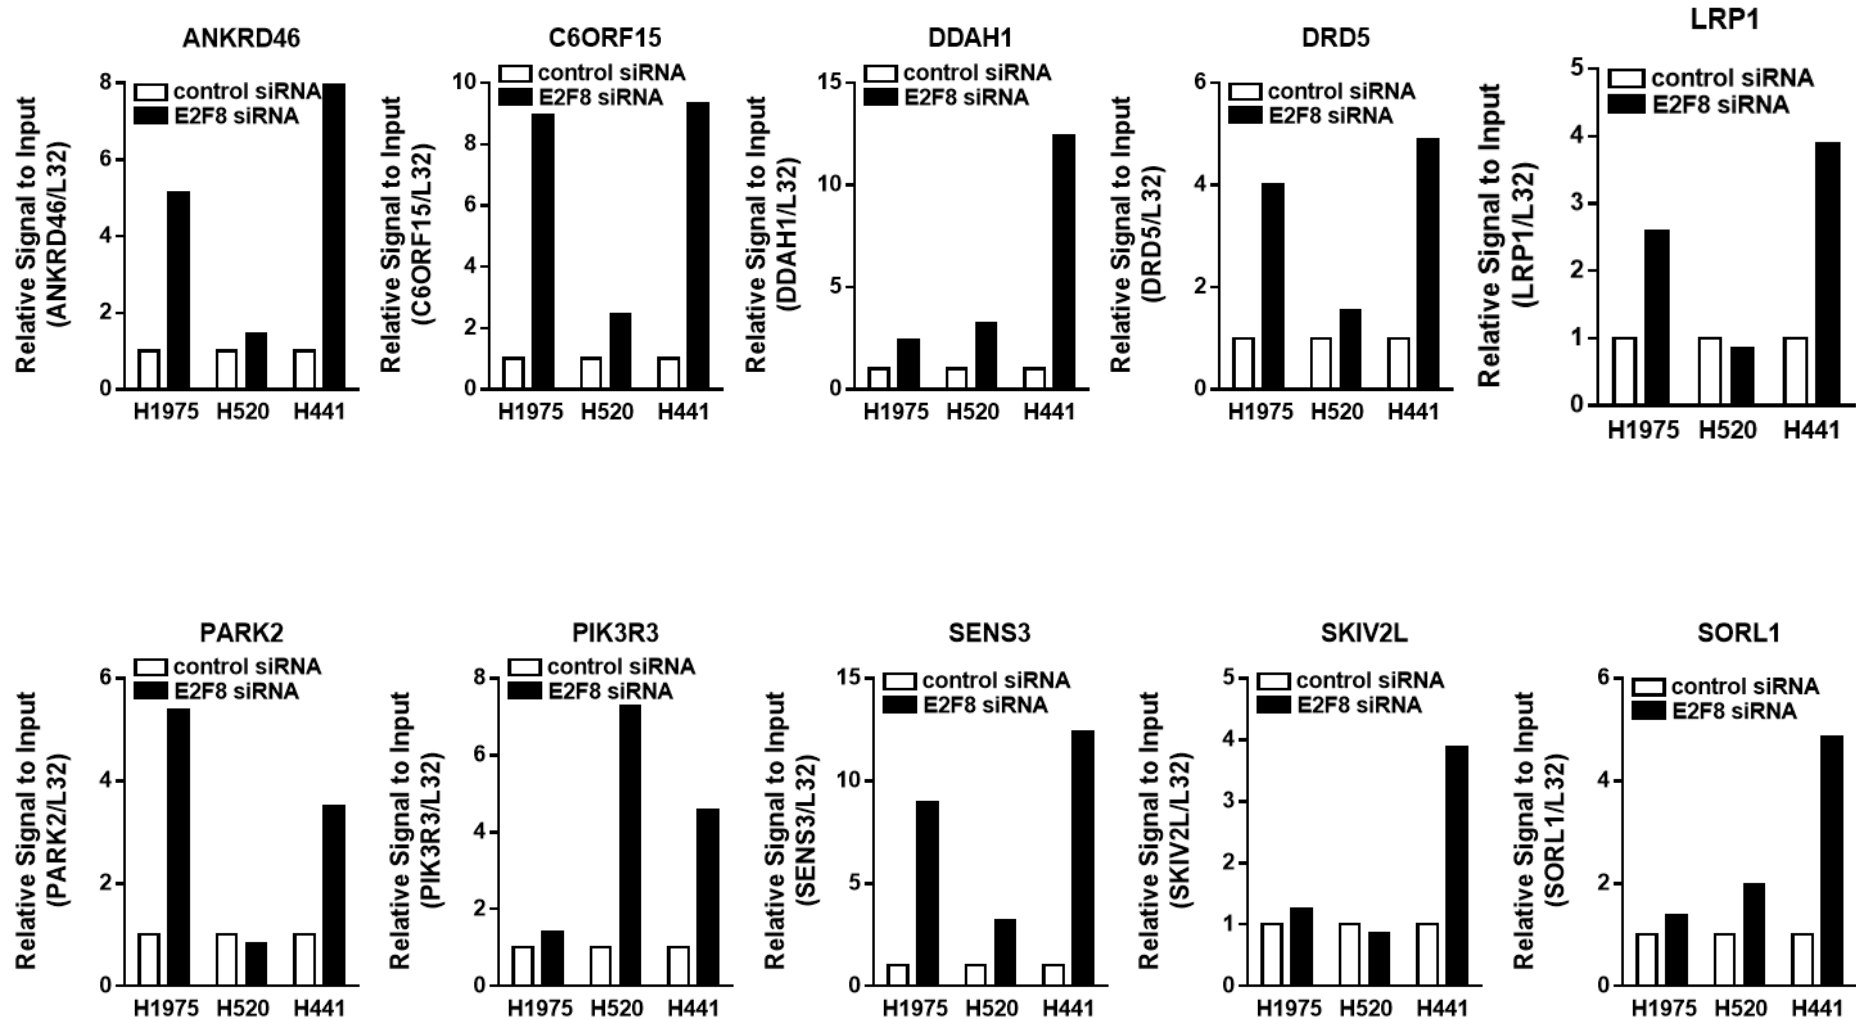

**Supplementary Figure 10, Related to Figure 5: Overlap of E2F8 siRNA-affected genes with E2F1 targets.**

(A-C) GSEA E2F1 targets contain genes from the GSEA Molecular Signatures Database, c3.tft.v3.0.symbols matching E2F1. These are genes which have an E2F1 binding site in their proximal promoter conserved in humans, mice, rats, and dogs. (A) LC – siE2F8 vs siControl shows genes up or downregulated 1.5 fold or more between the log<sub>2</sub> means of the three LC cell lines (H1975, H441, and H520) treated with siE2F8 versus siControl. (B and C) The same comparison is repeated for upregulated and downregulated genes respectively. Venn diagrams were created using the VennDiagram R package.

A

GSEA E2F1 targets      LC\_siE2F8 vs. siControl

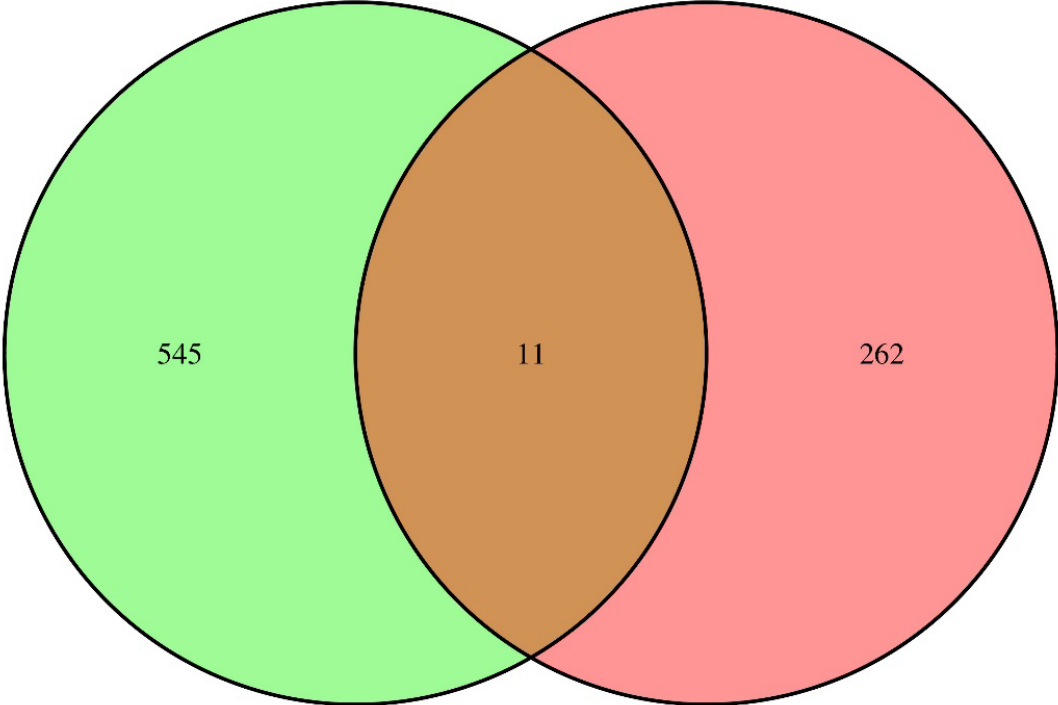

**B**

**GSEA E2F1 targets    LC\_siE2F8 vs. siControl  
: Upregulated only**

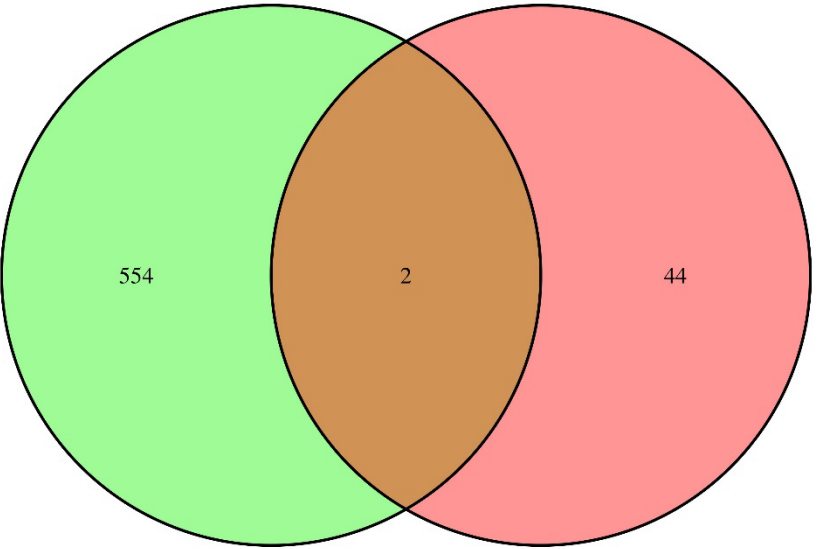

**C**

**GSEA E2F1 targets    LC\_siE2F8 vs. siControl  
: Downregulated only**

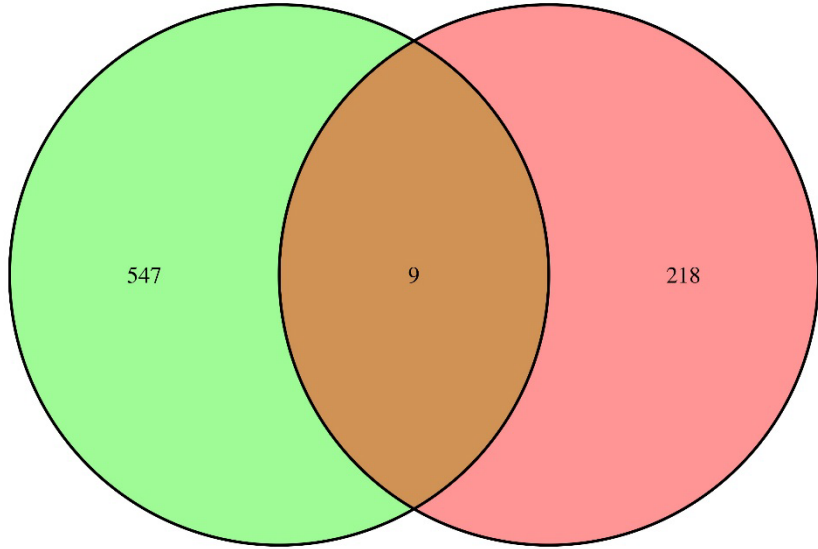



## References

1. Li H, Durbin R. Fast and accurate long-read alignment with Burrows-Wheeler transform. *Bioinformatics* 2010;26(5):589-595.
2. Heinz S, Benner C, Spann N, *et al.* Simple combinations of lineage-determining transcription factors prime cis-regulatory elements required for macrophage and B cell identities. *Mol Cell* 2010;38(4):576-589.
